# Supplementary material
Source: publisher figshare collection journal article supplement (https://gsapubs.figshare.com/articles/dataset/_/26017894)
Supplement: Supplementary file 1 [file 1]

## Sheet: Tuning
Metadata for LA-ICPMS U-Pb ages of calcite at Université Paris-Saclay
Laboratory and Sample Preparation
Laboratory name	Géosciences Paris Saclay (GEOPS), Université Paris-Saclay, Orsay, France
Sample type/mineral	Calcite
Sample preparation	Polished thin section 30 μm
Imaging	Cathodoluminescence microscope
Laser ablation system
Make, Model and type	193nm ArF Photon Machines (Teledyne)
Ablation cell	HelEx
Laser wavelength (nm)	193 m
Pulse width (ns)	5 ns
Fluence (J.cm-2)	1 J.cm-2
Repetition rate (Hz)	8 Hz
Pre-ablation	each spot during 4 s
Ablation duration (secs)	30 s
Spot size (mm)	150 μm
Sampling mode / pattern	Static spot ablation
Carrier gas	He
Cell carrier gas flow (l.min-1)	Helium
	Lage volume: 0.5 l.min-1
	Inner cup: 0.375 l.min-1
ICPMS instrument
ICPMS instrument Make, Model & type	ThermoScientific Element XR, sector-field single collector ICP-MS with high capacity interface pump
Sample introduction	Ablation aerosol
RF power (W)	1300 W
Make-up gas flow in ablation funnel (l.min-1)	Ar=0.950 to 1 l.min-1, N2=0.8 to 1.5 ml/min
Detection system	Ion counter in counting mode
Masses measured	206, 207, 208, 232, 238
Integration time per peak (ms)	10 ms for 208 and 232, 20 ms for 238, 35 ms for 206 and 45 ms for 207 by 750 runs
Total integration time per reading (secs)	0.12 s
IC Dead time (ns)	25 ns
Signal strength at ICPMS tuned conditions	Th/U=1
	248ThO/232Th below 0.3%
Data Processing
Data acquisition	Fully automated mode overnight in sequences of 398 analysis maximum
Gas blank	30 s background, 30 s sample ablation and 30 s washout
Calibration strategy	NIST614 glass standard as primary reference material for drift and 207Pb/206Pb ratios (see Roberts et al., 2017), WC-1 carbonate reference material for matrix matching of 206Pb/238U (anchored to initial Pb composition of 0.85, see Roberts et al., 2017), secondary reference material calcite Duff Brown Tank (Hill et al., 2016) and calcite breccia AUG-B6 (Pagel et al., 2018) for assessing accuracy a…
Reference Material info	NIST614 (concentration data of Jochum et al., 2011, Pb isotopes of Baker et al., 2004), WC-1 age: 254.4±6.4 Ma (Roberts et al., 2017), Duff Brown Tank age: 64±0.7 Ma (Hill et al., 2016) and calcite breccia AUG-B6 age: 43±1 Ma (Pagel et al., 2018)
Data processing package used / Correction for LIEF	Iolite4© to calculate uncertainties, no down-hole fractionation correction
Mass discrimination	207Pb/206Pb normalization to NIST614, 206Pb/238U normalized to WC-1
Common-Pb correction, composition and uncertainty	No common-Pb correction applied, Ages calculated by linear regressions in Tera- Wasserburg concordia plots (discordia Model-1 on IsoplotR Online)
Uncertainty level & propagation	Ages in the data table are quoted at 2sigma (2σ) absolute, uncertainty propagation by quadratic addition
Quality control / Validation	Measurements of WC-1, Duff Brown Tank (DBT) age were made along with samples throughout the analytical session in Supplementary Table XX. The DBT sample is slightly heterogeneous: two zones are of different ages (1) at 64 Ma and (2) at 70 Ma. On 7 July 2021, zone 2 at 70 Ma was sampled.
References
Baker, J., Peate, D., Waight, T., Meyzen, C., 2004. Pb isotopic analysis of standards and samples using a 207Pb-204Pb double spike and thallium to correct for mass bias with a double-focusing MC-ICP-MS. Chemical Geology 211, 275-303.
Hill, C.A., Polyak, V.J., Asmerom, Y. and Provencio, P., 2016. Constraints on a Late Cretaceous uplift, denudation, and incision of the Grand Canyon region, southwestern Colorado Plateau, USA, from U-Pb dating of lacustrine limestone: U-Pb age of lacustrine limestone. Tectonics, 35, 896–906.
Jochum, K.P., Weis, U., Stoll, B., Kuzmin, D., Yang, Q., Raczek, I., Jacob, D.E., Stracke, A., Birbaum, K., Frick, D.A., Günther, D., Enzweiler, J., 2011. Determination of reference values for NIST SRM 610-617 glasses following ISO guidelines. Geostandards and Geoanalytical Research 35, 397-429.
Pagel, M., Bonifacie, M., Schneider, D., Gautheron, C., Brigaud, B., Calmels, D., Cros, A., Saint-Bezar, B., Landrein, P., Sutcliffe, C., Davis, D., Chaduteau, C., 2018. Improving paleohydrological and diagenetic reconstructions in calcite veins and breccia of a sedimentary basin by combining Δ47 temperature, δ18Owater and U-Pb age. Chemical Geology 481, 1-17.
Roberts, N.M.W., Rasbury, E.T., Parrish, R.R., Smith, C.J., Horstwood, M.S.A., Condon, D.J., 2017. A calcite reference material for LA-ICP-MS U-Pb geochronology. Geochemistry, Geophysics, Geosystems 18, 2807-2814.

## Sheet: Samples
2021-09-03
UNCERTAINTIES OF NIST614 DURING SESSION
2σ NIST 614 Raw 206/238 (%)	1
2σ NIST 614 Raw 207/206 (%)	0.33
WC-1 (%)	2.56569
correction factor	0.881142
	Pb206/U238_mean	Pb206/U238_2SE(int)	U238/Pb206	U238/Pb206_2SE	DC Pb207/Pb206_mean	DC Pb207/Pb206_2SE(int)		WC-1 corrected 238U/206Pb	2SE	207Pb/206Pb	2SE	Reasons to delete the data for Isoplot built
McK1
McK 215.FIN2	0.00505475	0.000176342	197.834	6.90169	0.245095	0.0129803		174.319	6.08137	0.245095	0.0129803		age without systematic uncertainties			age with propagation by quadratic addition
McK 216.FIN2	0.0143911	0.0005213	69.4872	2.51708	0.640514	0.0296851		61.2281	2.21791	0.640514	0.0296851		age	2σ (Ma)	2σ (%)	2σ (%)	2σ (abs) Ma	age and 2σ
McK 217.FIN2	0.00843778	0.000285324	118.515	4.00758	0.494476	0.0213874		104.428	3.53124	0.494476	0.0213874		27.7	1	3.61011	4.55242	1.26102	27.7±1.3Ma
McK 218.FIN2	0.00940687	0.000330926	106.305	3.73974	0.528746	0.0222478		93.6701	3.29524	0.528746	0.0222478
McK 219.FIN2	0.0126649	0.000451353	78.9585	2.81394	0.598979	0.0273426		69.5736	2.47948	0.598979	0.0273426
McK 220.FIN2	0.01075	0.000350873	93.023	3.0362	0.564584	0.0195832		81.9664	2.67532	0.564584	0.0195832
McK 221.FIN2	0.00992809	0.000354066	100.724	3.59213	0.538332	0.0225761		88.7524	3.16518	0.538332	0.0225761
McK 222.FIN2	0.00579943	0.000192048	172.431	5.71003	0.322745	0.0139212		151.936	5.03135	0.322745	0.0139212
McK 223.FIN2	0.00743213	0.000234701	134.551	4.24901	0.456079	0.0192607		118.558	3.74398	0.456079	0.0192607
McK 224.FIN2	0.0159918	0.000549444	62.5322	2.14848	0.674723	0.0290004		55.0998	1.89312	0.674723	0.0290004
McK2
McK 225.FIN2	0.0111049	0.00044797	90.0503	3.63262	0.560118	0.0335615		79.3471	3.20085	0.560118	0.0335615		age without systematic uncertainties			age with propagation by quadratic addition
McK 226.FIN2	0.0159989	0.00058488	62.5043	2.285	0.676322	0.0362468		55.0752	2.01341	0.676322	0.0362468		age	2σ (Ma)	2σ (%)	2σ (%)	2σ (abs) Ma	age and 2σ
McK 227.FIN2	0.0133102	0.000482404	75.1306	2.72298	0.643598	0.0302679		66.2007	2.39933	0.643598	0.0302679		24.94	2.43	9.74338	10.1304	2.52652	24.94±2.5Ma
McK 228.FIN2	0.0123951	0.000444663	80.6768	2.8942	0.611189	0.0295841		71.0877	2.5502	0.611189	0.0295841
McK 229.FIN2	0.0178108	0.000614788	56.1456	1.93802	0.689985	0.0269218		49.4723	1.70767	0.689985	0.0269218
McK 230.FIN2	0.0146466	0.000560913	68.2754	2.61471	0.693767	0.0384201		60.1603	2.30393	0.693767	0.0384201
McK 231.FIN2	0.0100882	0.000376534	99.1253	3.69975	0.575497	0.0289036		87.3435	3.26001	0.575497	0.0289036
McK 232.FIN2	0.011634	0.000470502	85.955	3.47619	0.610852	0.0320091		75.7386	3.06302	0.610852	0.0320091
McK 233.FIN2	0.0578535	0.00196467	17.285	0.586992	0.791246	0.0239712		15.2306	0.517223	0.791246	0.0239712
McK 234.FIN2	0.0591659	0.002131	16.9016	0.608752	0.786553	0.0289162		14.8927	0.536397	0.786553	0.0289162
McK3
McK 235.FIN2	0.00518389	0.000526043	192.905	19.5753	0.399207	0.164966		169.977	17.2486	0.399207	0.164966		age without systematic uncertainties			age with propagation by quadratic addition
McK 236.FIN2	0.0109935	0.00080557	90.9629	6.66548	0.825748	0.136257		80.1512	5.87324	0.825748	0.136257		age	2σ (Ma)	2σ (%)	2σ (%)	2σ (abs) Ma	age and 2σ
McK 237.FIN2	0.01341	0.000949383	74.571	5.27936	0.831378	0.136642		65.7077	4.65187	0.831378	0.136642		23.8	3.5	14.7059	14.9651	3.5617	23.52±3.7Ma
McK 238.FIN2	0.0187388	0.00116836	53.3652	3.32731	0.787418	0.0712206		47.0223	2.93184	0.787418	0.0712206
McK 239.FIN2	0.00768595	0.00060821	130.108	10.2958	0.670516	0.161311		114.643	9.07204	0.670516	0.161311
McK 240.FIN2	0.00757224	0.000687103	132.061	11.9832	0.409965	1.26103		116.365	10.5589	0.409965	1.26103	Too large uncertainty
McK 241.FIN2	0.00724031	0.000600337	138.116	11.452	1.43751	0.86333		121.7	10.0908	1.43751	0.86333	Too large uncertainty
McK 242.FIN2	0.00714125	0.000526391	140.032	10.3219	0.577467	0.0738889		123.388	9.09508	0.577467	0.0738889
McK 243.FIN2	0.00740603	0.000720739	135.025	13.1404	2.30735	2.1419		118.976	11.5785	2.30735	2.1419	Too large uncertainty
McK 244.FIN2	0.00654308	0.000633798	152.833	14.8042	2.35685	2.10913		134.668	13.0446	2.35685	2.10913	Too large uncertainty
McK 245.FIN2	0.00720173	0.000446722	138.856	8.61318	0.513782	0.0702231		122.352	7.58944	0.513782	0.0702231
McK 246.FIN2	0.00564991	0.000462943	176.994	14.5025	2.29782	1.64093		155.957	12.7788	2.29782	1.64093	Too large uncertainty
McK 247.FIN2	0.00945734	0.000570911	105.738	6.38308	0.618869	0.0576549		93.1701	5.6244	0.618869	0.0576549
McK 248.FIN2	0.00958752	0.000576224	104.302	6.26872	0.603629	0.0581396		91.9051	5.52363	0.603629	0.0581396
McK 249.FIN2	0.00678375	0.000506871	147.411	11.0143	0.657888	0.136511		129.89	9.70518	0.657888	0.136511
McK 250.FIN2	0.00824277	0.000553907	121.318	8.1525	0.644989	0.0850267		106.899	7.18351	0.644989	0.0850267
McK 251.FIN2	0.00611155	0.000390264	163.625	10.4485	0.448733	0.0556734		144.176	9.20664	0.448733	0.0556734
McK 252.FIN2	0.00824818	0.000535489	121.239	7.87108	0.611103	0.0936951		106.829	6.93554	0.611103	0.0936951
McK 253.FIN2	0.00877991	0.000602233	113.896	7.8124	0.597159	0.0773983		100.359	6.88383	0.597159	0.0773983
McK 254.FIN2	0.00610385	0.000511159	163.831	13.7198	0.877278	0.756283		144.358	12.0891	0.877278	0.756283	Too large uncertainty
McK9
McK 255.FIN2	0.00761613	0.000594916	131.3	10.2562	0.512469	0.0898652		115.694	9.03719	0.512469	0.0898652		age without systematic uncertainties			age with propagation by quadratic addition
McK 256.FIN2	0.00794985	0.000541993	125.789	8.57582	0.958204	0.459301		110.838	7.55652	0.958204	0.459301		age	2σ (Ma)	2σ (%)	2σ (%)	2σ (abs) Ma	age and 2σ
McK 257.FIN2	0.00943297	0.000758712	106.011	8.52669	2.16872	1.72024		93.4109	7.51322	2.16872	1.72024	Too large uncertainty	21.3	3.9	18.3099	18.5187	3.94449	21.41±3.7Ma
McK 258.FIN2	0.0111324	0.000756371	89.8278	6.10318	0.726093	0.105878		79.151	5.37777	0.726093	0.105878
McK 259.FIN2	0.00990324	0.000713194	100.977	7.27199	0.668587	0.0905833		88.9751	6.40765	0.668587	0.0905833
McK 260.FIN2	0.00721884	0.000482057	138.526	9.25045	0.502462	0.112602		122.061	8.15096	0.502462	0.112602
McK 261.FIN2	0.0816908	0.00299093	12.2413	0.448188	0.820124	0.0352254		10.7863	0.394917	0.820124	0.0352254
McK 262.FIN2	0.03353	0.0015822	29.824	1.40732	0.801688	0.0531095		26.2792	1.24005	0.801688	0.0531095
McK 263.FIN2	0.00588523	0.000482087	169.917	13.9187	0.922961	0.667242		149.721	12.2644	0.922961	0.667242	Too large uncertainty
McK 264.FIN2	0.00632149	0.000366873	158.191	9.18073	0.494298	0.0552093		139.388	8.08953	0.494298	0.0552093
McK 265.FIN2	0.00584444	0.000452179	171.103	13.2381	0.477459	0.0944036		150.766	11.6646	0.477459	0.0944036
McK 266.FIN2	0.00815756	0.000455839	122.586	6.85001	0.512831	0.0447906		108.015	6.03583	0.512831	0.0447906
McK 267.FIN2	0.0159211	0.000983273	62.8096	3.87906	0.865186	0.0760974		55.3442	3.418	0.865186	0.0760974
McK 268.FIN2	0.0089	0.000587098	112.36	7.41191	0.681728	0.103152		99.0047	6.53095	0.681728	0.103152
McK 269.FIN2	0.00569561	0.000479719	175.574	14.7879	0.353149	0.317933		154.705	13.0302	0.353149	0.317933	Too large uncertainty
McK 270.FIN2	0.00710526	0.000541713	140.741	10.7302	0.557791	0.12899		124.013	9.45484	0.557791	0.12899
McK 271.FIN2	0.0114541	0.000601465	87.3047	4.58443	0.625779	0.0529157		76.9278	4.03954	0.625779	0.0529157
McK 272.FIN2	0.00893068	0.000657178	111.974	8.23975	0.796381	0.158708		98.6646	7.26039	0.796381	0.158708
McK 273.FIN2	0.0063516	0.000490844	157.441	12.1668	0.54954	0.143622		138.727	10.7207	0.54954	0.143622
McK 274.FIN2	0.0270075	0.00142612	37.0268	1.95519	0.814997	0.0552955		32.6259	1.7228	0.814997	0.0552955
2022-07-11
UNCERTAINTIES OF NIST614 DURING SESSION
2σ NIST 614 Raw 206/238 (%)	2.5
2σ NIST 614 Raw 207/206 (%)	0.47
WC-1 (%)	2.56569
correction factor	0.940878
	Pb206/U238_mean	Pb206/U238_2SE(int)	U238/Pb206	U238/Pb206_2SE	DC Pb207/Pb206_mean	DC Pb207/Pb206_2SE(int)		WC-1 corrected 238U/206Pb	2SE	207Pb/206Pb	2SE	Reasons to delete the data for Isoplot built
McK2 1
McK2-1 1.FIN2	0.0458392	0.00142148	21.8154	0.676497	0.778629	0.0277519		20.5256	0.636501	0.778629	0.0277519		age without systematic uncertainties			age with propagation by quadratic addition
McK2-1 2.FIN2	0.0351929	0.00119908	28.4148	0.968143	0.746727	0.0248065		26.7349	0.910904	0.746727	0.0248065		age	2σ (Ma)	2σ (%)	2σ (%)	2σ (abs) Ma	age and 2σ
McK2-1 3.FIN2	0.0120021	0.000473958	83.319	3.29025	0.569969	0.0260228		78.393	3.09572	0.569969	0.0260228		28.32	1.33	4.69633	5.9253	1.67804	28.32±1.7Ma
McK2-1 4.FIN2	0.0073302	0.000359551	136.422	6.69158	0.406505	0.026933		128.356	6.29596	0.406505	0.026933
McK2-1 5.FIN2	0.01581	0.0006076	63.2513	2.43084	0.641743	0.0261581		59.5117	2.28712	0.641743	0.0261581
McK2-1 6.FIN2	0.0673447	0.00215199	14.849	0.474497	0.793568	0.0317781		13.9711	0.446444	0.793568	0.0317781
McK2-1 7.FIN2	0.0114059	0.000532373	87.6739	4.0922	0.546412	0.0301206		82.4904	3.85026	0.546412	0.0301206
McK2-1 8.FIN2	0.00651142	0.000298719	153.576	7.04551	0.328788	0.0277088		144.497	6.62896	0.328788	0.0277088
McK2-1 9.FIN2	0.0110257	0.00042513	90.6972	3.49711	0.549773	0.0285528		85.335	3.29035	0.549773	0.0285528
McK2-1 10.FIN2	0.0190646	0.000764627	52.4531	2.10374	0.675644	0.035733		49.352	1.97936	0.675644	0.035733
McK2-1 11.FIN2	0.0122826	0.00138458	81.416	9.1778	0.555597	0.0317109		76.6025	8.63519	0.555597	0.0317109
McK2-1 12.FIN2	0.0213535	0.000842266	46.8307	1.84718	0.681474	0.023417		44.062	1.73797	0.681474	0.023417
McK2-1 13.FIN2	0.0094902	0.000365792	105.372	4.06148	0.491581	0.0266713		99.1421	3.82136	0.491581	0.0266713
McK2-1 14.FIN2	0.0201699	0.000674374	49.5789	1.65765	0.694771	0.0276188		46.6477	1.55965	0.694771	0.0276188
McK2-1 15.FIN2	0.0147287	0.000547333	67.8946	2.52303	0.638942	0.0317437		63.8805	2.37386	0.638942	0.0317437
McK2-1 16.FIN2	0.0345587	0.00113609	28.9363	0.951261	0.747076	0.0310971		27.2255	0.89502	0.747076	0.0310971
McK2-1 17.FIN2	0.00748696	0.000348617	133.566	6.21926	0.42866	0.0319267		125.669	5.85156	0.42866	0.0319267		age without systematic uncertainties			age with propagation by quadratic addition
McK2-1 18.FIN2	0.00476656	0.000221548	209.795	9.7512	0.166928	0.0181619		197.392	9.17468	0.166928	0.0181619		age	2σ (Ma)	2σ (%)	2σ (%)	2σ (abs) Ma	age and 2σ
McK2-1 19.FIN2	0.00573532	0.000285266	174.358	8.67232	0.276261	0.0251144		164.05	8.15959	0.276261	0.0251144		29.03	0.92	3.16914	4.80594	1.39517	29.03±1.4Ma
McK2-1 20.FIN2	0.00717927	0.00029984	139.29	5.81741	0.402021	0.0238045		131.055	5.47347	0.402021	0.0238045
McK2-1 21.FIN2	0.00550343	0.000245543	181.705	8.10703	0.258806	0.023874		170.962	7.62773	0.258806	0.023874
McK2-1 22.FIN2	0.00514438	0.000236294	194.387	8.92868	0.178401	0.0173348		182.894	8.40079	0.178401	0.0173348
McK2-1 23.FIN2	0.00898173	0.000332145	111.337	4.11725	0.482538	0.030464		104.755	3.87383	0.482538	0.030464
McK2-1 24.FIN2	0.00848206	0.0004266	117.896	5.9295	0.465285	0.0298249		110.926	5.57894	0.465285	0.0298249
McK2-1 25.FIN2	0.00635095	0.000293503	157.457	7.27671	0.301518	0.0254804		148.147	6.84649	0.301518	0.0254804
McK2-1 26.FIN2	0.00763918	0.000321897	130.904	5.516	0.41348	0.0291208		123.165	5.18988	0.41348	0.0291208
McK2-1 27.FIN2	0.00893475	0.000406649	111.923	5.09396	0.512519	0.0315117		105.305	4.79279	0.512519	0.0315117
McK2-1 28.FIN2	0.00567368	0.000266462	176.252	8.27761	0.246684	0.0261369		165.832	7.78822	0.246684	0.0261369
McK2-1 29.FIN2	0.00585695	0.000258131	170.737	7.52485	0.265383	0.0213081		160.643	7.07996	0.265383	0.0213081
McK2-1 30.FIN2	0.00757482	0.000319293	132.016	5.56475	0.405182	0.0258258		124.211	5.23574	0.405182	0.0258258
McK2-1 31.FIN2	0.00529426	0.000263234	188.884	9.39143	0.21055	0.0222569		177.717	8.83619	0.21055	0.0222569
McK2-1 32.FIN2	0.00601749	0.000480896	166.182	13.2807	0.290873	0.0444399		156.357	12.4955	0.290873	0.0444399
McK2-1 33.FIN2	0.0131716	0.000905626	75.9211	5.22004	0.684655	0.0728076		71.4325	4.91142	0.684655	0.0728076		age without systematic uncertainties			age with propagation by quadratic addition
McK2-1 34.FIN2	0.0148107	0.00106073	67.5185	4.83562	0.638548	0.0810563		63.5267	4.54972	0.638548	0.0810563		age	2σ (Ma)	2σ (%)	2σ (%)	2σ (abs) Ma	age and 2σ
McK2-1 35.FIN2	0.00737651	0.000471835	135.565	8.67137	0.387656	0.0387488		127.551	8.1587	0.387656	0.0387488		26.6	1.82	6.84211	7.73745	2.05816	26.6±2.1Ma
McK2-1 36.FIN2	0.00533803	0.000311359	187.335	10.9269	0.249354	0.0296524		176.259	10.2809	0.249354	0.0296524
McK2-1 37.FIN2	0.00999906	0.000679062	100.009	6.7919	0.623488	0.0687407		94.0966	6.39035	0.623488	0.0687407
McK2-1 38.FIN2	0.00658671	0.000376625	151.821	8.68106	0.337353	0.029214		142.845	8.16781	0.337353	0.029214
McK2-1 39.FIN2	0.116445	0.00431716	8.58771	0.318385	0.810215	0.0300456		8.07999	0.299561	0.810215	0.0300456
McK2-1 40.FIN2	0.0173324	0.00115458	57.6954	3.84332	0.781595	0.0818852		54.2843	3.61609	0.781595	0.0818852
McK2-1 41.FIN2	0.126512	0.00564629	7.90439	0.352776	0.811701	0.0325378		7.43706	0.331919	0.811701	0.0325378
McK2-1 42.FIN2	0.00949989	0.00069412	105.264	7.69125	0.55997	0.0693935		99.0409	7.23653	0.55997	0.0693935
McK2-1 43.FIN2	0.0104653	0.000820779	95.5534	7.49409	0.590293	0.165126		89.9041	7.05102	0.590293	0.165126
McK2-1 44.FIN2	0.0099354	0.000543387	100.65	5.50477	0.587405	0.0452524		94.6995	5.17931	0.587405	0.0452524
McK2-1 45.FIN2	0.0101253	0.000588008	98.7624	5.73544	0.554469	0.0503784		92.9234	5.39635	0.554469	0.0503784
McK2-1 46.FIN2	0.00558694	0.000359577	178.989	11.5198	0.267111	0.0289001		168.407	10.8387	0.267111	0.0289001
McK2-1 47.FIN2	0.00889461	0.000579075	112.428	7.31949	0.627293	0.0848303		105.781	6.88675	0.627293	0.0848303
McK2-1 48.FIN2	0.0049411	0.000303968	202.384	12.4503	0.236047	0.0359577		190.419	11.7143	0.236047	0.0359577
McK2-1 49.FIN2	0.00968327	0.000700834	103.271	7.47431	0.616914	0.0874024		97.1653	7.03242	0.616914	0.0874024		age without systematic uncertainties			age with propagation by quadratic addition
McK2-1 50.FIN2	0.00673063	0.000357895	148.575	7.90032	0.360402	0.0314375		139.79	7.43323	0.360402	0.0314375		age	2σ (Ma)	2σ (%)	2σ (%)	2σ (abs) Ma	age and 2σ
McK2-1 51.FIN2	0.00520157	0.000241235	192.25	8.91602	0.204131	0.0261365		180.883	8.38889	0.204131	0.0261365		29.7	3	10.101	10.7277	3.18613	29.59±3.0Ma
McK2-1 52.FIN2	0.00759901	0.000393976	131.596	6.8227	0.367108	0.0287404		123.816	6.41932	0.367108	0.0287404
McK2-1 53.FIN2	0.00624523	0.000549838	160.122	14.0974	0.360989	0.106569		150.655	13.2639	0.360989	0.106569
McK2-1 54.FIN2	0.007819	0.000378461	127.894	6.19041	0.420807	0.0323844		120.332	5.82442	0.420807	0.0323844
McK2-1 55.FIN2	0.00839308	0.000437033	119.146	6.204	0.473307	0.0330161		112.102	5.8372	0.473307	0.0330161
McK2-1 56.FIN2	0.0054021	0.000463584	185.113	15.8856	0.364229	0.110431		174.169	14.9464	0.364229	0.110431
McK2-1 57.FIN2	0.00681786	0.000402354	146.674	8.65589	0.408748	0.0424663		138.002	8.14414	0.408748	0.0424663
McK2-1 58.FIN2	0.00722831	0.000369742	138.345	7.0766	0.406912	0.0316051		130.166	6.65821	0.406912	0.0316051
McK2-1 59.FIN2	0.00605302	0.000321041	165.207	8.76225	0.308254	0.0239711		155.439	8.24421	0.308254	0.0239711
McK2-1 60.FIN2	0.00806192	0.000554045	124.04	8.52447	0.540242	0.0708478		116.706	8.02049	0.540242	0.0708478
McK2-1 61.FIN2	0.0079768	0.000549571	125.364	8.63708	0.468396	0.0690705		117.952	8.12644	0.468396	0.0690705
McK2-1 62.FIN2	0.0082797	0.000571937	120.777	8.34295	0.528346	0.0625203		113.637	7.84969	0.528346	0.0625203
McK2-1 63.FIN2	0.00812928	0.000411385	123.012	6.22507	0.478244	0.0393316		115.739	5.85703	0.478244	0.0393316
McK2-1 64.FIN2	0.0100414	0.00111461	99.5879	11.0545	0.906583	0.351972		93.7001	10.4009	0.906583	0.351972
McK2-1 65.FIN2	0.0121549	0.000907397	82.2712	6.14177	0.772098	0.105848		77.4072	5.77865	0.772098	0.105848		age without systematic uncertainties			age with propagation by quadratic addition
McK2-1 66.FIN2	0.00950617	0.000726182	105.195	8.03589	0.560304	0.0757502		98.9754	7.56079	0.560304	0.0757502		age	2σ (Ma)	2σ (%)	2σ (%)	2σ (abs) Ma	age and 2σ
McK2-1 67.FIN2	0.0118048	0.000746836	84.711	5.35925	0.688331	0.0845941		79.7027	5.0424	0.688331	0.0845941		30.8	1.8	5.84416	6.87079	2.1162	30.8±1.8Ma
McK2-1 68.FIN2	0.00944538	0.000502604	105.872	5.63361	0.471381	0.0292843		99.6125	5.30054	0.471381	0.0292843
McK2-1 69.FIN2	0.00609893	0.000309948	163.963	8.3326	0.274692	0.0258141		154.269	7.83996	0.274692	0.0258141
McK2-1 70.FIN2	0.00546733	0.000286336	182.905	9.57912	0.260255	0.0324562		172.091	9.01278	0.260255	0.0324562
McK2-1 71.FIN2	-554.974	147.731	-0.00180189	0.000479651	0.962659	0.0629326		-0.00169535	0.000451293	0.962659	0.0629326
McK2-1 72.FIN2	0.00596835	0.000299032	167.55	8.39477	0.238436	0.0222636		157.644	7.89845	0.238436	0.0222636
McK2-1 73.FIN2	0.0103843	0.000711915	96.2994	6.602	0.620702	0.0847969		90.6059	6.21167	0.620702	0.0847969
McK2-1 74.FIN2	0.00606247	0.000304793	164.949	8.29291	0.276158	0.0231821		155.197	7.80261	0.276158	0.0231821
McK2-1 75.FIN2	0.0056609	0.00027056	176.65	8.4429	0.243355	0.0221355		166.206	7.94374	0.243355	0.0221355
McK2-1 76.FIN2	0.00466061	0.000228448	214.564	10.5172	0.113732	0.0133056		201.879	9.89545	0.113732	0.0133056
McK2-1 77.FIN2	0.0101725	0.000860241	98.3042	8.31312	0.840505	0.339353		92.4922	7.82163	0.840505	0.339353
McK2-1 78.FIN2	0.00578726	0.000300075	172.793	8.95949	0.223977	0.0219754		162.577	8.42979	0.223977	0.0219754
McK2-1 79.FIN2	0.00730416	0.000321597	136.908	6.02798	0.367369	0.0283479		128.814	5.6716	0.367369	0.0283479
McK2-1 80.FIN2	0.00809186	0.000511174	123.581	7.80679	0.46248	0.0414301		116.275	7.34524	0.46248	0.0414301
McK2-1 81.FIN2	-448.452	64.9227	-0.00222989	0.000322822	1.17876	0.318146		-0.00209805	0.000303737	1.17876	0.318146	error	age without systematic uncertainties			age with propagation by quadratic addition
McK2-1 82.FIN2	0.00906696	0.000806363	110.291	9.80859	0.540209	0.118024		103.77	9.22869	0.540209	0.118024		age	2σ (Ma)	2σ (%)	2σ (%)	2σ (abs) Ma	age and 2σ
McK2-1 83.FIN2	0.00810081	0.000890134	123.444	13.5643	0.443848	0.111771		116.146	12.7624	0.443848	0.111771		32.82	2.6	7.922	8.70699	2.85764	32.76±2.9Ma
McK2-1 84.FIN2	0.00572016	0.000765526	174.82	23.3961	0.233818	0.161115		164.485	22.0129	0.233818	0.161115
McK2-1 85.FIN2	0.00585936	0.000745818	170.667	21.7236	0.217128	0.143409		160.577	20.4393	0.217128	0.143409
McK2-1 86.FIN2	0.00596265	0.000711482	167.711	20.0118	0.28708	0.157949		157.795	18.8286	0.28708	0.157949
McK2-1 87.FIN2	0.00638641	0.000682836	156.582	16.7418	0.251236	0.12541		147.325	15.752	0.251236	0.12541
McK2-1 88.FIN2	0.00658654	0.000738511	151.825	17.0232	0.388713	0.145178		142.849	16.0168	0.388713	0.145178
McK2-1 89.FIN2	0.0140647	0.00180548	71.1001	9.12709	0.509208	0.151216		66.8965	8.58747	0.509208	0.151216
McK2-1 90.FIN2	0.00762944	0.000866263	131.071	14.8821	0.368684	0.167971		123.322	14.0022	0.368684	0.167971
McK2-1 91.FIN2	0.00745562	0.000755568	134.127	13.5927	0.45177	0.11056		126.197	12.7891	0.45177	0.11056
McK2-1 92.FIN2	0.0112823	0.000946828	88.6346	7.43837	0.62173	0.136613		83.3943	6.99859	0.62173	0.136613
McK2-1 93.FIN2	0.00884078	0.000892906	113.112	11.4242	0.218882	0.327888		106.425	10.7487	0.218882	0.327888	Too large uncertainty
McK2-1 94.FIN2	0.0238244	0.00191297	41.9737	3.37026	0.825327	0.0702557		39.4921	3.171	0.825327	0.0702557
McK2-1 95.FIN2	0.00654736	0.00067253	152.733	15.6884	0.317819	0.13492		143.703	14.7609	0.317819	0.13492
McK2-1 96.FIN2	0.0579447	0.00476846	17.2578	1.42021	1.04212	0.0977427		16.2375	1.33624	1.04212	0.0977427
McK2-1 97.FIN2	0.0115128	0.000757627	86.8597	5.716	0.656878	0.0826514		81.7244	5.37806	0.656878	0.0826514		age without systematic uncertainties			age with propagation by quadratic addition
McK2-1 98.FIN2	0.00699066	0.000484197	143.048	9.90802	0.470278	0.0735876		134.591	9.32223	0.470278	0.0735876		age	2σ (Ma)	2σ (%)	2σ (%)	2σ (abs) Ma	age and 2σ
McK2-1 99.FIN2	0.00704841	0.000504766	141.876	10.1603	0.500837	0.0703138		133.488	9.55964	0.500837	0.0703138		24.46	6.6	26.9828	27.2236	6.6589	25.29±4.5Ma
McK2-1 100.FIN2	0.0130433	0.000719716	76.6676	4.23044	0.648219	0.0575804		72.1349	3.98033	0.648219	0.0575804
McK2-1 101.FIN2	0.0138054	0.000859585	72.4356	4.51017	0.759517	0.0869553		68.153	4.24352	0.759517	0.0869553
McK2-1 102.FIN2	0.00730749	0.000535581	136.846	10.0297	0.509417	0.110602		128.755	9.43675	0.509417	0.110602
McK2-1 103.FIN2	0.00763055	0.000586265	131.052	10.0689	0.595025	0.0998699		123.304	9.47361	0.595025	0.0998699
McK2-1 104.FIN2	0.0106693	0.000734523	93.7269	6.4526	0.65606	0.0934652		88.1856	6.07111	0.65606	0.0934652
McK2-1 105.FIN2	0.00822066	0.000619143	121.645	9.16173	0.765331	0.142429		114.453	8.62006	0.765331	0.142429
McK2-1 106.FIN2	0.0090753	0.000659804	110.189	8.01112	0.575266	0.0788491		103.675	7.53749	0.575266	0.0788491
McK2-1 107.FIN2	0.00910971	0.000614819	109.773	7.40864	0.673253	0.252518		103.283	6.97062	0.673253	0.252518
McK2-1 108.FIN2	0.00819426	0.000804957	122.037	11.9882	0.394876	0.0933279		114.822	11.2794	0.394876	0.0933279
McK2-1 109.FIN2	0.0101047	0.000702167	98.9643	6.87698	0.640932	0.117502		93.1133	6.4704	0.640932	0.117502
McK2-1 110.FIN2	0.00905324	0.000733499	110.458	8.94935	0.559604	0.0877467		103.927	8.42025	0.559604	0.0877467
McK2-1 111.FIN2	0.0104141	0.000908425	96.0237	8.37617	0.728227	0.110166		90.3465	7.88095	0.728227	0.110166
McK2-1 112.FIN2	0.0138992	0.00254948	71.9465	13.1969	0.733407	0.0951257		67.6928	12.4166	0.733407	0.0951257
McK3 1a
McK3-1a 161.FIN2	0.0049386	0.000360377	202.487	14.7758	0.211086	0.0386058		190.515	13.9022	0.211086	0.0386058		age without systematic uncertainties			age with propagation by quadratic addition
McK3-1a 162.FIN2	0.00613267	0.000391077	163.061	10.3983	0.281451	0.0350313		153.421	9.78355	0.281451	0.0350313		age	2σ (Ma)	2σ (%)	2σ (%)	2σ (abs) Ma	age and 2σ
McK3-1a 163.FIN2	0.0145072	0.00102942	68.9311	4.89129	0.759585	0.0745493		64.8557	4.6021	0.759585	0.0745493		28.09	1.79	6.37237	7.32535	2.05769	28.09±2.1Ma
McK3-1a 164.FIN2	0.0101934	0.000721453	98.1029	6.94339	0.592076	0.0569612		92.3028	6.53288	0.592076	0.0569612
McK3-1a 165.FIN2	0.0117268	0.00113941	85.2751	8.28558	0.557566	0.0684465		80.2334	7.79572	0.557566	0.0684465
McK3-1a 166.FIN2	0.00798886	0.000419082	125.174	6.56644	0.483539	0.0426139		117.774	6.17821	0.483539	0.0426139
McK3-1a 167.FIN2	0.00501498	0.000314799	199.403	12.5168	0.245494	0.0358993		187.613	11.7768	0.245494	0.0358993
McK3-1a 168.FIN2	0.0740594	0.00683318	13.5027	1.24584	1.00725	0.124557		12.7044	1.17219	1.00725	0.124557
McK3-1a 169.FIN2	0.00551649	0.000403463	181.275	13.258	0.311791	0.0417089		170.557	12.4742	0.311791	0.0417089
McK3-1a 170.FIN2	0.00533874	0.000338431	187.31	11.8739	0.262102	0.0463272		176.236	11.1719	0.262102	0.0463272
McK3-1a 171.FIN2	0.0109864	0.000848815	91.0214	7.03235	0.515077	0.0344232		85.64	6.61658	0.515077	0.0344232
McK3-1a 172.FIN2	0.00720719	0.000598335	138.75	11.5189	0.368127	0.0585539		130.547	10.8379	0.368127	0.0585539
McK3-1a 173.FIN2	0.0132492	0.00117245	75.4761	6.67905	0.777289	0.119013		71.0138	6.28417	0.777289	0.119013
McK3-1a 174.FIN2	0.00457431	0.000246584	218.612	11.7846	0.125855	0.0216334		205.687	11.0878	0.125855	0.0216334
McK3-1a 175.FIN2	0.0050051	0.000318705	199.796	12.7223	0.262731	0.0408711		187.984	11.9701	0.262731	0.0408711
McK3-1a 176.FIN2	0.00475253	0.000304709	210.414	13.4907	0.143363	0.0397748		197.974	12.6931	0.143363	0.0397748
McK3-1a 177.FIN2	0.00566142	0.000490682	176.634	15.3091	0.213814	0.028975		166.191	14.404	0.213814	0.028975		age without systematic uncertainties			age with propagation by quadratic addition
McK3-1a 178.FIN2	0.00493501	0.000388307	202.634	15.9441	0.131219	0.0314074		190.654	15.0014	0.131219	0.0314074		age	2σ (Ma)	2σ (%)	2σ (%)	2σ (abs) Ma	age and 2σ
McK3-1a 179.FIN2	0.0125295	0.00142959	79.8114	9.10628	0.672691	0.186363		75.0928	8.5679	0.672691	0.186363		29.91	0.84	2.80843	4.57612	1.36872	29.97±1.4Ma
McK3-1a 180.FIN2	0.00497092	0.000360318	201.17	14.5819	0.165471	0.030778		189.277	13.7198	0.165471	0.030778
McK3-1a 181.FIN2	0.0416933	0.00508853	23.9847	2.92725	0.947796	0.376126		22.5666	2.75418	0.947796	0.376126
McK3-1a 182.FIN2	0.00586552	0.000455278	170.488	13.2332	0.318917	0.0631273		160.408	12.4508	0.318917	0.0631273
McK3-1a 183.FIN2	0.00497658	0.000378407	200.941	15.2791	0.199322	0.0332543		189.061	14.3757	0.199322	0.0332543
McK3-1a 184.FIN2	0.00493382	0.000324042	202.683	13.3118	0.13875	0.0189229		190.7	12.5247	0.13875	0.0189229
McK3-1a 185.FIN2	0.0356206	0.00354924	28.0736	2.79726	0.670639	0.288797		26.4139	2.63188	0.670639	0.288797
McK3-1a 186.FIN2	0.0114011	0.000991699	87.7108	7.62932	0.584256	0.0728323		82.5252	7.17826	0.584256	0.0728323
McK3-1a 187.FIN2	0.00538923	0.000330939	185.555	11.3945	0.170736	0.022463		174.585	10.7208	0.170736	0.022463
McK3-1a 188.FIN2	0.00518965	0.000420839	192.691	15.6257	0.167602	0.0261919		181.299	14.7019	0.167602	0.0261919
McK3-1a 189.FIN2	0.00488549	0.000338996	204.688	14.2029	0.140017	0.0224904		192.586	13.3632	0.140017	0.0224904
McK3-1a 190.FIN2	0.00456119	0.00025573	219.241	12.2921	0.0846797	0.016092		206.279	11.5653	0.0846797	0.016092
McK3-1a 191.FIN2	0.00558602	0.000414283	179.018	13.2768	0.252007	0.0354078		168.434	12.4918	0.252007	0.0354078
McK3-1a 192.FIN2	0.00464009	0.000234714	215.513	10.9015	0.108354	0.011902		202.772	10.257	0.108354	0.011902
McK3-1a 193.FIN2	0.0048721	0.000348445	205.25	14.6792	0.128759	0.0308666		193.116	13.8113	0.128759	0.0308666		age without systematic uncertainties			age with propagation by quadratic addition
McK3-1a 194.FIN2	0.00452641	0.000297176	220.925	14.5046	0.128626	0.0342102		207.864	13.647	0.128626	0.0342102		age	2σ (Ma)	2σ (%)	2σ (%)	2σ (abs) Ma	age and 2σ
McK3-1a 195.FIN2	0.00466365	0.000300636	214.424	13.8226	0.122766	0.0187728		201.747	13.0054	0.122766	0.0187728		29.16	1.07	3.66941	5.14959	1.50162	29.16±1.5Ma
McK3-1a 196.FIN2	0.00440546	0.000273015	226.991	14.0671	0.109994	0.0152291		213.571	13.2354	0.109994	0.0152291
McK3-1a 197.FIN2	0.0052849	0.00034029	189.218	12.1836	0.158499	0.0254183		178.031	11.4633	0.158499	0.0254183
McK3-1a 198.FIN2	0.00512995	0.000354792	194.934	13.4818	0.123104	0.0238318		183.409	12.6847	0.123104	0.0238318
McK3-1a 199.FIN2	0.00579997	0.000356188	172.415	10.5883	0.271042	0.0325562		162.221	9.9623	0.271042	0.0325562
McK3-1a 200.FIN2	0.00712484	0.000476314	140.354	9.38302	0.338698	0.0353391		132.056	8.82828	0.338698	0.0353391
McK3-1a 201.FIN2	0.00461865	0.000274827	216.513	12.8834	0.115849	0.0172638		203.713	12.1217	0.115849	0.0172638
McK3-1a 202.FIN2	0.00512002	0.000325754	195.312	12.4265	0.112921	0.015154		183.765	11.6918	0.112921	0.015154
McK3-1a 203.FIN2	0.00437345	0.000238131	228.652	12.4499	0.0716932	0.0138313		215.134	11.7139	0.0716932	0.0138313
McK3-1a 204.FIN2	0.00458393	0.000295253	218.154	14.0514	0.0941858	0.0155974		205.256	13.2206	0.0941858	0.0155974
McK3-1a 205.FIN2	0.00478801	0.000325445	208.855	14.1961	0.119709	0.045504		196.507	13.3568	0.119709	0.045504
McK3-1a 206.FIN2	0.00459207	0.000217682	217.767	10.323	0.129927	0.0145322		204.892	9.71267	0.129927	0.0145322
McK3-1a 207.FIN2	0.00481034	0.000252793	207.886	10.9248	0.125793	0.0197976		195.595	10.2789	0.125793	0.0197976
McK3-1a 208.FIN2	0.00488879	0.000291398	204.55	12.1923	0.101956	0.014357		192.456	11.4714	0.101956	0.014357
McK3-1a 209.FIN2	0.00441321	0.000264468	226.592	13.5788	0.102786	0.0162403		213.196	12.776	0.102786	0.0162403		age without systematic uncertainties			age with propagation by quadratic addition
McK3-1a 210.FIN2	0.00447121	0.000241629	223.653	12.0865	0.106449	0.0157088		210.43	11.3719	0.106449	0.0157088		age	2σ (Ma)	2σ (%)	2σ (%)	2σ (abs) Ma	age and 2σ
McK3-1a 211.FIN2	0.0042138	0.000227108	237.316	12.7904	0.0952856	0.0182766		223.285	12.0342	0.0952856	0.0182766		28.9	1.07	3.70242	5.17316	1.49504	28.9±1.5Ma
McK3-1a 212.FIN2	0.0044552	0.000234976	224.457	11.8383	0.0709451	0.0134662		211.186	11.1384	0.0709451	0.0134662
McK3-1a 213.FIN2	0.00456024	0.000250465	219.287	12.044	0.0899567	0.0157041		206.322	11.3319	0.0899567	0.0157041
McK3-1a 214.FIN2	0.00472186	0.000270845	211.781	12.1477	0.0897422	0.0169545		199.26	11.4295	0.0897422	0.0169545
McK3-1a 215.FIN2	0.0048424	0.000302418	206.509	12.8969	0.129055	0.0188513		194.3	12.1344	0.129055	0.0188513
McK3-1a 216.FIN2	0.00453104	0.000283773	220.7	13.8221	0.135005	0.0307424		207.651	13.0049	0.135005	0.0307424
McK3-1a 217.FIN2	0.00906283	0.00164772	110.341	20.0612	0.46911	0.0973463		103.817	18.8751	0.46911	0.0973463
McK3-1a 218.FIN2	0.00498163	0.000416488	200.737	16.7826	0.124587	0.0207681		188.869	15.7904	0.124587	0.0207681
McK3-1a 219.FIN2	0.00472955	0.000291249	211.436	13.0204	0.133963	0.0273912		198.936	12.2506	0.133963	0.0273912
McK3-1a 220.FIN2	0.00592344	0.000688699	168.821	19.6282	0.432263	0.128765		158.84	18.4678	0.432263	0.128765
McK3-1a 221.FIN2	0.00443007	0.000271435	225.73	13.8307	0.0975413	0.022507		212.384	13.013	0.0975413	0.022507
McK3-1a 222.FIN2	0.00435293	0.000269002	229.73	14.1968	0.121287	0.0326867		216.148	13.3575	0.121287	0.0326867
McK3-1a 223.FIN2	0.00508893	0.000659979	196.505	25.4845	0.86512	0.568294		184.887	23.9778	0.86512	0.568294	Too large uncertainty
McK3-1a 224.FIN2	0.00495208	0.000397507	201.935	16.2095	0.21958	0.0914989		189.996	15.2512	0.21958	0.0914989
McK3-1a 273.FIN2	0.00868173	0.000405513	115.184	5.38011	0.468808	0.029175		108.374	5.06203	0.468808	0.029175		age without systematic uncertainties			age with propagation by quadratic addition
McK3-1a 274.FIN2	0.024366	0.00193062	41.0407	3.25182	0.733495	0.074237		38.6143	3.05956	0.733495	0.074237		age	2σ (Ma)	2σ (%)	2σ (%)	2σ (abs) Ma	age and 2σ
McK3-1a 275.FIN2	0.0158966	0.00107415	62.9064	4.25066	0.834751	0.105404		59.1872	3.99935	0.834751	0.105404		32.34	5.1	15.7699	16.1785	5.23214	32.31±5.0Ma
McK3-1a 276.FIN2	0.0208023	0.00150476	48.0717	3.47734	0.858307	0.108291		45.2296	3.27175	0.858307	0.108291
McK3-1a 277.FIN2	0.014639	0.00116787	68.3107	5.44972	0.816353	0.127434		64.272	5.12752	0.816353	0.127434
McK3-1a 278.FIN2	0.0109785	0.000878857	91.087	7.29173	0.573811	0.0488248		85.7017	6.86063	0.573811	0.0488248
McK3-1a 279.FIN2	0.0132783	0.000857488	75.3106	4.8634	0.691769	0.0682423		70.858	4.57587	0.691769	0.0682423
McK3-1a 280.FIN2	0.0118438	0.000944868	84.432	6.73574	0.827802	0.119556		79.4402	6.33751	0.827802	0.119556
McK3-1a 281.FIN2	0.0211135	0.00931412	47.3632	20.8941	0.946071	0.180405		44.5629	19.6588	0.946071	0.180405
McK3-1a 282.FIN2	0.0134905	0.00229145	74.1263	12.5908	0.657722	0.115928		69.7438	11.8464	0.657722	0.115928
McK3-1a 283.FIN2	0.0271662	0.00185404	36.8105	2.51224	0.827967	0.0695221		34.6342	2.36372	0.827967	0.0695221
McK3-1a 284.FIN2	0.0614948	0.00463649	16.2615	1.22606	0.893372	0.0826917		15.3001	1.15358	0.893372	0.0826917
McK3-1a 285.FIN2	0.00854019	0.000631999	117.093	8.66527	0.46479	0.0418246		110.171	8.15296	0.46479	0.0418246
McK3-1a 286.FIN2	0.0692246	0.00889024	14.4457	1.85521	1.27256	0.194897		13.5917	1.74552	1.27256	0.194897
McK3-1a 287.FIN2	0.0175727	0.00160044	56.9063	5.18275	0.886948	0.322064		53.5419	4.87634	0.886948	0.322064
McK3-1a 288.FIN2	0.00911114	0.000590161	109.756	7.10927	0.601946	0.0613834		103.267	6.68895	0.601946	0.0613834
McK3 1c
McK3-1c 225.FIN2	0.011139	0.00303613	89.7747	24.4697	0.508863	0.0886049		84.467	23.023	0.508863	0.0886049		age without systematic uncertainties			age with propagation by quadratic addition
McK3-1c 226.FIN2	0.0111368	0.0008618	89.7923	6.94839	0.692936	0.106959		84.4836	6.53759	0.692936	0.106959		age	2σ (Ma)	2σ (%)	2σ (%)	2σ (abs) Ma	age and 2σ
McK3-1c 227.FIN2	0.00956372	0.000772733	104.562	8.44843	0.51828	0.111799		98.3799	7.94894	0.51828	0.111799		31.04	3.7	11.9201	12.4556	3.86623	30.76±4.1Ma
McK3-1c 228.FIN2	0.00938449	0.000557578	106.559	6.33118	0.573247	0.0634582		100.259	5.95686	0.573247	0.0634582
McK3-1c 229.FIN2	0.00694968	0.000501536	143.891	10.3842	0.405776	0.0717922		135.384	9.77024	0.405776	0.0717922
McK3-1c 230.FIN2	0.00808158	0.00117556	123.738	17.9992	0.526558	0.11072		116.423	16.935	0.526558	0.11072
McK3-1c 231.FIN2	0.0185188	0.00287051	53.9993	8.37018	0.851597	0.13614		50.8067	7.87532	0.851597	0.13614
McK3-1c 232.FIN2	0.00779944	0.000515426	128.214	8.47304	0.417289	0.0583123		120.634	7.9721	0.417289	0.0583123
McK3-1c 233.FIN2	0.0081864	0.000622345	122.154	9.28637	0.443815	0.0699578		114.932	8.73734	0.443815	0.0699578
McK3-1c 234.FIN2	0.00601474	0.000479558	166.258	13.2558	0.34698	0.0660962		156.429	12.4721	0.34698	0.0660962
McK3-1c 235.FIN2	0.00922974	0.000912942	108.345	10.7168	0.423258	0.153825		101.94	10.0832	0.423258	0.153825
McK3-1c 236.FIN2	0.0079597	0.00058097	125.633	9.16981	0.516257	0.0747296		118.205	8.62767	0.516257	0.0747296
McK3-1c 237.FIN2	0.00865123	0.000713348	115.59	9.53116	0.568997	0.0995345		108.757	8.96766	0.568997	0.0995345
McK3-1c 238.FIN2	0.008943	0.000994885	111.819	12.4396	0.439811	0.0929672		105.208	11.7041	0.439811	0.0929672
McK3-1c 239.FIN2	0.00755296	0.000808209	132.398	14.1674	0.524312	0.112013		124.571	13.3298	0.524312	0.112013
McK3-1c 240.FIN2	0.0117542	0.00280913	85.076	20.3323	0.841048	0.322691		80.0461	19.1302	0.841048	0.322691
McK3-1c 241.FIN2	0.0163449	0.00129945	61.1812	4.86404	1.02226	0.192808		57.564	4.57646	1.02226	0.192808		age without systematic uncertainties			age with propagation by quadratic addition
McK3-1c 242.FIN2	0.00722361	0.000516272	138.435	9.89396	0.433805	0.056075		130.25	9.30901	0.433805	0.056075		age	2σ (Ma)	2σ (%)	2σ (%)	2σ (abs) Ma	age and 2σ
McK3-1c 243.FIN2	0.0159586	0.00130268	62.662	5.115	0.674551	0.078683		58.9573	4.81259	0.674551	0.078683		29.32	3.92	13.3697	13.8493	4.06061	29.32±4.1Ma
McK3-1c 244.FIN2	0.00875531	0.000686585	114.216	8.95677	0.494208	0.0655261		107.464	8.42723	0.494208	0.0655261
McK3-1c 245.FIN2	0.0126232	0.000844908	79.2195	5.30242	0.645653	0.0807844		74.5359	4.98893	0.645653	0.0807844
McK3-1c 246.FIN2	0.0155645	0.00118315	64.2489	4.88397	0.736836	0.0720224		60.4504	4.59522	0.736836	0.0720224
McK3-1c 247.FIN2	0.00696054	0.000514105	143.667	10.6112	0.52709	0.102902		135.173	9.98387	0.52709	0.102902
McK3-1c 248.FIN2	0.00916319	0.000734879	109.132	8.75231	0.737742	0.14203		102.68	8.23486	0.737742	0.14203
McK3-1c 249.FIN2	0.0177126	0.00151804	56.4571	4.83862	0.785562	0.148592		53.1193	4.55255	0.785562	0.148592
McK3-1c 250.FIN2	0.00479195	0.000359415	208.683	15.6521	0.111819	0.0479984		196.346	14.7267	0.111819	0.0479984
McK3-1c 251.FIN2	0.00648227	0.000660839	154.267	15.7269	0.561374	0.112544		145.146	14.797	0.561374	0.112544
McK3-1c 252.FIN2	0.00736372	0.000550813	135.801	10.158	0.371127	0.0559875		127.772	9.55747	0.371127	0.0559875
McK3-1c 253.FIN2	0.00710129	0.000662793	140.82	13.1433	0.140826	0.3717		132.494	12.3662	0.140826	0.3717	Too large uncertainty
McK3-1c 254.FIN2	0.00626558	0.000508328	159.602	12.9485	0.457186	0.105425		150.166	12.183	0.457186	0.105425
McK3-1c 255.FIN2	0.00703668	0.000612289	142.113	12.3658	0.520711	0.188869		133.71	11.6347	0.520711	0.188869
McK3-1c 256.FIN2	0.018977	0.0014939	52.6953	4.14825	0.932684	0.107788		49.5798	3.903	0.932684	0.107788
McK3-1c 257.FIN2	0.00648554	0.000517966	154.189	12.3143	0.287395	0.0538274		145.073	11.5862	0.287395	0.0538274		age without systematic uncertainties			age with propagation by quadratic addition
McK3-1c 258.FIN2	0.015657	0.00131191	63.869	5.35159	0.845918	0.187112		60.0929	5.03519	0.845918	0.187112		age	2σ (Ma)	2σ (%)	2σ (%)	2σ (abs) Ma	age and 2σ
McK3-1c 259.FIN2	0.00469385	0.000349189	213.045	15.849	0.187068	0.124318		200.449	14.912	0.187068	0.124318		28.85	2.1	7.27903	8.12637	2.34446	28.83±2.2Ma
McK3-1c 260.FIN2	0.0134707	0.00114165	74.2351	6.29145	0.93187	0.165039		69.8461	5.91948	0.93187	0.165039
McK3-1c 261.FIN2	0.0061786	0.000484194	161.849	12.6835	0.318216	0.0619446		152.28	11.9336	0.318216	0.0619446
McK3-1c 262.FIN2	0.00429735	0.000305124	232.701	16.5224	0.118126	0.0372774		218.944	15.5456	0.118126	0.0372774
McK3-1c 263.FIN2	0.00480289	0.000365074	208.208	15.8261	0.127996	0.0453746		195.898	14.8905	0.127996	0.0453746
McK3-1c 264.FIN2	0.00729358	0.000788291	137.107	14.8185	0.439633	0.103172		129.001	13.9424	0.439633	0.103172
McK3-1c 265.FIN2	0.0247647	0.00176607	40.3801	2.87966	0.894329	0.0882538		37.9927	2.70941	0.894329	0.0882538
McK3-1c 266.FIN2	0.0379694	0.0132892	26.337	9.21793	1.94933	0.792991		24.7799	8.67294	1.94933	0.792991
McK3-1c 267.FIN2	0.0193664	0.00173394	51.6357	4.62312	0.95906	0.141723		48.5829	4.34979	0.95906	0.141723
McK3-1c 268.FIN2	0.0127422	0.000967658	78.4794	5.95982	0.754325	0.224168		73.8395	5.60746	0.754325	0.224168
McK3-1c 269.FIN2	0.00609561	0.000484197	164.053	13.0313	0.291654	0.0677722		154.353	12.2609	0.291654	0.0677722
McK3-1c 270.FIN2	0.00452613	0.000411219	220.939	20.0733	0.197862	0.0679885		207.877	18.8865	0.197862	0.0679885
McK3-1c 271.FIN2	0.00673025	0.000527695	148.583	11.6499	0.432495	0.0836808		139.798	10.9611	0.432495	0.0836808
McK3-1c 272.FIN2	0.0926987	0.00841816	10.7876	0.979648	0.909188	0.0829202		10.1498	0.921729	0.909188	0.0829202
McK3 3
McK3-3 113.FIN2	0.0120889	0.00193726	82.7205	13.256	1.23986	0.634479		77.8298	12.4723	1.23986	0.634479	Too large uncertainty	age without systematic uncertainties			age with propagation by quadratic addition
McK3-3 114.FIN2	0.00867667	0.000535821	115.252	7.11728	0.70965	0.177194		108.438	6.69649	0.70965	0.177194		age	2σ (Ma)	2σ (%)	2σ (%)	2σ (abs) Ma	age and 2σ
McK3-3 115.FIN2	0.00964586	0.00200078	103.671	21.504	0.894272	0.561469		97.5422	20.2326	0.894272	0.561469	Too large uncertainty	27.5	7.6	27.6364	27.8715	7.66467	26.76±8.2Ma
McK3-3 116.FIN2	0.0136446	0.00395816	73.2892	21.2605	0.777153	0.200343		68.9562	20.0035	0.777153	0.200343
McK3-3 117.FIN2	0.0154355	0.00151263	64.7856	6.34878	0.797275	0.135814		60.9554	5.97343	0.797275	0.135814
McK3-3 118.FIN2	0.0126534	0.000731067	79.03	4.56606	0.643196	0.0669552		74.3576	4.2961	0.643196	0.0669552
McK3-3 119.FIN2	0.0096586	0.00144537	103.535	15.4936	0.574298	0.128816		97.4135	14.5775	0.574298	0.128816
McK3-3 120.FIN2	0.0142346	0.00365786	70.2512	18.0524	0.83387	0.281588		66.0978	16.9851	0.83387	0.281588
McK3-3 121.FIN2	0.00773119	0.000610297	129.346	10.2105	0.522539	0.161759		121.699	9.60687	0.522539	0.161759
McK3-3 122.FIN2	0.00976357	0.00174203	102.422	18.2742	0.502885	0.0943048		96.3661	17.1938	0.502885	0.0943048
McK3-3 123.FIN2	0.00820367	0.000510936	121.897	7.59189	0.518283	0.0881194		114.69	7.14304	0.518283	0.0881194
McK3-3 124.FIN2	0.00961823	0.000609264	103.969	6.5859	0.628876	0.0957717		97.8223	6.19653	0.628876	0.0957717
McK3-3 125.FIN2	0.00964009	0.000573846	103.733	6.17495	0.567284	0.0872462		97.6005	5.80987	0.567284	0.0872462
McK3-3 126.FIN2	0.00872333	0.000646758	114.635	8.4992	0.639653	0.140238		107.858	7.9967	0.639653	0.140238
McK3-3 127.FIN2	0.0093186	0.00063522	107.312	7.31514	0.553395	0.0613558		100.968	6.88266	0.553395	0.0613558
McK3-3 128.FIN2	0.00928796	0.000607483	107.666	7.04197	0.573934	0.0600719		101.301	6.62563	0.573934	0.0600719
McK3-3 129.FIN2	0.00901792	0.000560579	110.89	6.89325	0.50229	0.0563537		104.334	6.4857	0.50229	0.0563537		age without systematic uncertainties			age with propagation by quadratic addition
McK3-3 130.FIN2	0.00694661	0.000409405	143.955	8.48414	0.38293	0.0398145		135.444	7.98254	0.38293	0.0398145		age	2σ (Ma)	2σ (%)	2σ (%)	2σ (abs) Ma	age and 2σ
McK3-3 131.FIN2	0.00848227	0.000480238	117.893	6.6747	0.457995	0.0361979		110.923	6.28008	0.457995	0.0361979		30.55	1.2	3.92799	5.33692	1.63043	30.55±1.6Ma
McK3-3 132.FIN2	0.0094384	0.000675585	105.95	7.58373	0.658532	0.0810614		99.6862	7.13536	0.658532	0.0810614
McK3-3 133.FIN2	0.00487273	0.00022166	205.224	9.33559	0.0985963	0.0128233		193.09	8.78365	0.0985963	0.0128233
McK3-3 134.FIN2	0.0114715	0.000682674	87.1723	5.18765	0.517067	0.0445736		82.0185	4.88095	0.517067	0.0445736
McK3-3 135.FIN2	0.00467106	0.000202662	214.084	9.28839	0.0900941	0.0115191		201.427	8.73924	0.0900941	0.0115191
McK3-3 136.FIN2	0.00485997	0.000245422	205.763	10.3907	0.120893	0.0155668		193.598	9.77641	0.120893	0.0155668
McK3-3 137.FIN2	0.00685481	0.000451037	145.883	9.59891	0.337359	0.0374611		137.258	9.0314	0.337359	0.0374611
McK3-3 138.FIN2	0.00494979	0.000250988	202.029	10.2443	0.103598	0.0148296		190.085	9.6386	0.103598	0.0148296
McK3-3 139.FIN2	0.00636767	0.000346137	157.043	8.53663	0.38337	0.0422056		147.759	8.03192	0.38337	0.0422056
McK3-3 140.FIN2	0.00483307	0.000238755	206.908	10.2213	0.108215	0.0142286		194.675	9.61699	0.108215	0.0142286
McK3-3 141.FIN2	0.00542771	0.000333588	184.24	11.3234	0.281856	0.0373489		173.347	10.654	0.281856	0.0373489
McK3-3 142.FIN2	0.00660926	0.000430463	151.303	9.8544	0.315534	0.0405402		142.358	9.27178	0.315534	0.0405402
McK3-3 143.FIN2	0.00525126	0.00031347	190.431	11.3676	0.184983	0.0274285		179.172	10.6955	0.184983	0.0274285
McK3-3 144.FIN2	0.00611897	0.000581159	163.426	15.5216	0.292982	0.0702915		153.764	14.604	0.292982	0.0702915
McK3-3 145.FIN2	0.00586138	0.000537218	170.608	15.6369	0.456428	0.190471		160.522	14.7124	0.456428	0.190471		age without systematic uncertainties			age with propagation by quadratic addition
McK3-3 146.FIN2	0.00565177	0.000483987	176.936	15.1518	0.384402	0.0934804		166.475	14.256	0.384402	0.0934804		age	2σ (Ma)	2σ (%)	2σ (%)	2σ (abs) Ma	age and 2σ
McK3-3 147.FIN2	0.0212722	0.00136854	47.0097	3.02435	0.862705	0.0873952		44.2304	2.84554	0.862705	0.0873952		29.2	1.9	6.50685	7.44263	2.17325	29.17±2.2Ma
McK3-3 148.FIN2	0.00725622	0.000492681	137.813	9.35717	0.446776	0.0626275		129.665	8.80396	0.446776	0.0626275
McK3-3 149.FIN2	0.00593084	0.000496056	168.61	14.1026	0.328427	0.0851662		158.642	13.2688	0.328427	0.0851662
McK3-3 150.FIN2	0.00816955	0.000505059	122.406	7.56739	0.464293	0.0492053		115.169	7.11999	0.464293	0.0492053
McK3-3 151.FIN2	-124.081	84.5701	-0.00805925	0.00549295	0.864799	0.0534383		-0.00758277	0.0051682	0.864799	0.0534383	error
McK3-3 152.FIN2	0.0187667	0.00159942	53.2859	4.54137	0.789941	0.11533		50.1355	4.27287	0.789941	0.11533
McK3-3 153.FIN2	0.00585558	0.000590026	170.777	17.2081	0.126309	0.146575		160.681	16.1907	0.126309	0.146575	Too large uncertainty
McK3-3 154.FIN2	0.00684129	0.000501678	146.171	10.7189	0.49747	0.072291		137.529	10.0852	0.49747	0.072291
McK3-3 155.FIN2	0.00635807	0.000560253	157.281	13.8591	0.442227	0.107309		147.982	13.0397	0.442227	0.107309
McK3-3 156.FIN2	0.00670097	0.000662785	149.232	14.7604	0.47109	0.217455		140.409	13.8877	0.47109	0.217455
McK3-3 157.FIN2	0.00554292	0.000472523	180.41	15.3796	0.277647	0.0820264		169.744	14.4703	0.277647	0.0820264
McK3-3 158.FIN2	0.00597413	0.000422001	167.388	11.824	0.294462	0.0438644		157.492	11.1249	0.294462	0.0438644
McK3-3 159.FIN2	0.0109406	0.00411625	91.4028	34.3891	0.800652	0.385924		85.9989	32.356	0.800652	0.385924
McK3-3 160.FIN2	0.030206	0.00237318	33.106	2.60102	1.0247	0.144445		31.1487	2.44724	1.0247	0.144445
2022-07-12
UNCERTAINTIES OF NIST614 DURING SESSION
2σ NIST 614 Raw 206/238 (%)	1.8
2σ NIST 614 Raw 207/206 (%)	0.47
WC-1 (%)	2.56569
correction factor	0.906054
	Pb206/U238_mean	Pb206/U238_2SE(int)	U238/Pb206	U238/Pb206_2SE	DC Pb207/Pb206_mean	DC Pb207/Pb206_2SE(int)		WC-1 corrected 238U/206Pb	2SE	207Pb/206Pb	2SE	Reasons to delete the data for Isoplot built
McK2-2
McK2-2 209.FIN2	-21.6453	18.4633	-0.0461994	0.0394078	1.08855	0.205612		-0.0418592	0.0357056	1.08855	0.205612	error	age without systematic uncertainties			age with propagation by quadratic addition
McK2-2 210.FIN2	0.00663924	0.000272618	150.62	6.18468	0.351284	0.020221		136.47	5.60366	0.351284	0.020221		age	2σ (Ma)	2σ (%)	2σ (%)	2σ (abs) Ma	age and 2σ
McK2-2 211.FIN2	0.00545338	0.000215453	183.373	7.24473	0.27333	0.0209478		166.145	6.56411	0.27333	0.0209478		28.51	0.79	2.77096	4.20974	1.2002	28.51±1.2Ma
McK2-2 212.FIN2	0.00651918	0.000305237	153.393	7.18208	0.351704	0.0293393		138.983	6.50736	0.351704	0.0293393
McK2-2 213.FIN2	0.00476735	0.000203609	209.76	8.95867	0.162723	0.014545		190.054	8.11704	0.162723	0.014545
McK2-2 214.FIN2	0.00683812	0.000244771	146.239	5.23463	0.346232	0.0181906		132.501	4.74286	0.346232	0.0181906
McK2-2 215.FIN2	0.00526034	0.000177373	190.102	6.41002	0.232921	0.0137035		172.243	5.80783	0.232921	0.0137035
McK2-2 216.FIN2	0.00612175	0.00019477	163.352	5.19722	0.337954	0.0175159		148.006	4.70896	0.337954	0.0175159
McK2-2 217.FIN2	0.00736908	0.000282875	135.702	5.20915	0.40818	0.0205683		122.953	4.71977	0.40818	0.0205683
McK2-2 218.FIN2	0.0114459	0.000375982	87.3672	2.86988	0.536376	0.0244911		79.1594	2.60027	0.536376	0.0244911
McK2-2 219.FIN2	0.0114337	0.00035635	87.4604	2.72584	0.57387	0.0230565		79.2439	2.46976	0.57387	0.0230565
McK2-2 220.FIN2	0.00687966	0.000320744	145.356	6.77679	0.367077	0.0240889		131.7	6.14014	0.367077	0.0240889
McK2-2 221.FIN2	0.00532366	0.000224575	187.841	7.92392	0.217456	0.0190473		170.194	7.17951	0.217456	0.0190473
McK2-2 222.FIN2	0.00617384	0.00028044	161.974	7.35746	0.341379	0.0289622		146.757	6.66626	0.341379	0.0289622
McK2-2 223.FIN2	0.0107331	0.00047014	93.1694	4.08107	0.519567	0.0325652		84.4166	3.69767	0.519567	0.0325652
McK2-2 224.FIN2	0.00912578	0.000473539	109.58	5.68611	0.54261	0.0568567		99.2851	5.15193	0.54261	0.0568567
McK2-2 225.FIN2	0.00562063	0.000186019	177.916	5.88825	0.302498	0.0149921		161.201	5.33507	0.302498	0.0149921		age without systematic uncertainties			age with propagation by quadratic addition
McK2-2 226.FIN2	0.00636673	0.000275554	157.067	6.79789	0.318227	0.0260398		142.311	6.15926	0.318227	0.0260398		age	2σ (Ma)	2σ (%)	2σ (%)	2σ (abs) Ma	age and 2σ
McK2-2 227.FIN2	0.00912694	0.000610293	109.566	7.32637	0.542003	0.0462253		99.2726	6.63809	0.542003	0.0462253		28.04	1.7	6.06277	6.84111	1.91825	28.04±1.9Ma
McK2-2 228.FIN2	0.00763346	0.000373626	131.002	6.412	0.465498	0.0400715		118.695	5.80962	0.465498	0.0400715
McK2-2 229.FIN2	0.00514037	0.00018801	194.539	7.11528	0.241782	0.0141252		176.263	6.44683	0.241782	0.0141252
McK2-2 230.FIN2	0.00740954	0.00023863	134.961	4.34653	0.406284	0.0194336		122.282	3.93819	0.406284	0.0194336
McK2-2 231.FIN2	0.00630767	0.000285729	158.537	7.18152	0.36323	0.0284802		143.643	6.50685	0.36323	0.0284802
McK2-2 232.FIN2	0.00631057	0.000221458	158.464	5.56101	0.330016	0.0187991		143.577	5.03858	0.330016	0.0187991
McK2-2 233.FIN2	0.00556127	0.000292813	179.815	9.46766	0.326389	0.031886		162.922	8.57821	0.326389	0.031886
McK2-2 234.FIN2	0.00519228	0.000170104	192.594	6.30954	0.245124	0.0157289		174.5	5.71678	0.245124	0.0157289
McK2-2 235.FIN2	0.00618044	0.00029473	161.801	7.71589	0.334314	0.0275396		146.6	6.99102	0.334314	0.0275396
McK2-2 236.FIN2	0.00539703	0.0001677	185.287	5.75736	0.251097	0.0148874		167.88	5.21648	0.251097	0.0148874
McK2-2 237.FIN2	0.00700409	0.00020749	142.774	4.22955	0.391985	0.0159715		129.361	3.83221	0.391985	0.0159715
McK2-2 238.FIN2	0.00932984	0.00060532	107.183	6.95404	0.498369	0.0358236		97.1136	6.30074	0.498369	0.0358236
McK2-2 239.FIN2	0.00652832	0.000212442	153.179	4.98468	0.33876	0.0171971		138.788	4.51639	0.33876	0.0171971
McK2-2 240.FIN2	0.0119487	0.000662181	83.6909	4.63803	0.802583	0.146873		75.8285	4.20231	0.802583	0.146873
McK2-2 241.FIN2	0.00525558	0.000342745	190.274	12.4088	0.233932	0.0555275		172.399	11.243	0.233932	0.0555275		age without systematic uncertainties			age with propagation by quadratic addition
McK2-2 242.FIN2	0.00442796	0.000252959	225.838	12.9016	0.259309	0.166006		204.621	11.6895	0.259309	0.166006		age	2σ (Ma)	2σ (%)	2σ (%)	2σ (abs) Ma	age and 2σ
McK2-2 243.FIN2	0.00502111	0.000313677	199.159	12.4418	0.324191	0.102454		180.449	11.2729	0.324191	0.102454		26.86	2.3	8.56292	9.13057	2.45247	26.86±2.5Ma
McK2-2 244.FIN2	0.0071741	0.000432636	139.39	8.40596	0.433937	0.0491779		126.295	7.61626	0.433937	0.0491779
McK2-2 245.FIN2	0.00457965	0.000299091	218.357	14.2607	0.218835	0.0502934		197.844	12.9209	0.218835	0.0502934
McK2-2 246.FIN2	0.00500882	0.000351046	199.648	13.9924	0.199451	0.0408466		180.892	12.6779	0.199451	0.0408466
McK2-2 247.FIN2	0.00835253	0.000435289	119.724	6.23938	0.456021	0.0409657		108.477	5.65322	0.456021	0.0409657
McK2-2 248.FIN2	0.0052263	0.000392126	191.34	14.3561	0.266057	0.0840824		173.364	13.0074	0.266057	0.0840824
McK2-2 249.FIN2	0.00472631	0.000310272	211.581	13.8899	0.150765	0.147085		191.704	12.585	0.150765	0.147085
McK2-2 250.FIN2	0.00529406	0.000346507	188.891	12.3633	0.27529	0.0660611		171.146	11.2018	0.27529	0.0660611
McK2-2 251.FIN2	0.00478615	0.00033601	208.936	14.6683	0.311773	0.0602772		189.308	13.2903	0.311773	0.0602772
McK2-2 252.FIN2	0.00621921	0.000493992	160.792	12.7717	0.300162	0.0583709		145.686	11.5719	0.300162	0.0583709
McK2-2 253.FIN2	0.00590862	0.000633203	169.244	18.1372	0.549801	0.222199		153.344	16.4333	0.549801	0.222199
McK2-2 254.FIN2	0.00556265	0.000456427	179.771	14.7506	0.4514	0.182669		162.882	13.3648	0.4514	0.182669
McK2-2 255.FIN2	0.00612557	0.000779733	163.25	20.7803	0.302865	0.0892411		147.913	18.8281	0.302865	0.0892411
McK2-2 256.FIN2	0.00460033	0.000278197	217.376	13.1454	0.137884	0.026332		196.954	11.9105	0.137884	0.026332
McK3-1b
McK3-1b 97.FIN2	0.00445959	0.000208079	224.236	10.4626	0.100194	0.0123322		203.17	9.47965	0.100194	0.0123322		age without systematic uncertainties			age with propagation by quadratic addition
McK3-1b 98.FIN2	0.00443936	0.000219649	225.258	11.1452	0.125689	0.0142941		204.096	10.0982	0.125689	0.0142941		age	2σ (Ma)	2σ (%)	2σ (%)	2σ (abs) Ma	age and 2σ
McK3-1b 99.FIN2	0.00467421	0.000232455	213.94	10.6395	0.169569	0.0182953		193.841	9.63998	0.169569	0.0182953		29.13	0.86	2.95228	4.33124	1.26169	29.17±2.2Ma
McK3-1b 100.FIN2	0.00472897	0.000224419	211.463	10.0352	0.121851	0.0120097		191.597	9.09244	0.121851	0.0120097
McK3-1b 101.FIN2	0.00464091	0.000214241	215.475	9.94708	0.151688	0.0154562		195.232	9.0126	0.151688	0.0154562
McK3-1b 102.FIN2	0.00732899	0.000369863	136.444	6.88577	0.406251	0.0282236		123.626	6.23888	0.406251	0.0282236
McK3-1b 103.FIN2	0.00541713	0.00026004	184.6	8.86141	0.275037	0.0213549		167.257	8.02892	0.275037	0.0213549
McK3-1b 104.FIN2	0.00456229	0.000224243	219.188	10.7734	0.138823	0.0145987		198.597	9.76132	0.138823	0.0145987
McK3-1b 105.FIN2	0.00503843	0.00028014	198.475	11.0353	0.181422	0.0170448		179.829	9.99859	0.181422	0.0170448
McK3-1b 106.FIN2	0.00469679	0.000204219	212.912	9.25753	0.126416	0.0131752		192.909	8.38783	0.126416	0.0131752
McK3-1b 107.FIN2	0.00469784	0.000220936	212.864	10.0108	0.191375	0.017574		192.866	9.07035	0.191375	0.017574
McK3-1b 108.FIN2	0.00694305	0.000445904	144.029	9.24998	0.372636	0.0337529		130.498	8.38098	0.372636	0.0337529
McK3-1b 109.FIN2	0.00798628	0.000402515	125.215	6.31094	0.456163	0.0339558		113.451	5.71805	0.456163	0.0339558
McK3-1b 110.FIN2	0.00551843	0.000255928	181.211	8.40402	0.313826	0.0274987		164.187	7.61449	0.313826	0.0274987
McK3-1b 111.FIN2	0.00480374	0.00023914	208.171	10.3632	0.162958	0.0174218		188.614	9.38961	0.162958	0.0174218
McK3-1b 112.FIN2	0.00522026	0.00026756	191.561	9.81834	0.266448	0.0259784		173.565	8.89595	0.266448	0.0259784
McK3-1b 113.FIN2	0.00482712	0.0002362	207.163	10.1369	0.196931	0.0193425		187.701	9.18456	0.196931	0.0193425		age without systematic uncertainties			age with propagation by quadratic addition
McK3-1b 114.FIN2	0.0055943	0.000268831	178.753	8.58991	0.272435	0.0215183		161.96	7.78293	0.272435	0.0215183		age	2σ (Ma)	2σ (%)	2σ (%)	2σ (abs) Ma	age and 2σ
McK3-1b 115.FIN2	0.0104567	0.00052511	95.632	4.80238	0.571899	0.0402616		86.6478	4.35122	0.571899	0.0402616		28.54	0.49	1.71689	3.60435	1.02868	28.54±1.0Ma
McK3-1b 116.FIN2	0.00533961	0.000233583	187.28	8.19262	0.275018	0.0208569		169.686	7.42296	0.275018	0.0208569
McK3-1b 117.FIN2	0.00434068	0.000184436	230.379	9.78882	0.118004	0.0132605		208.736	8.8692	0.118004	0.0132605
McK3-1b 118.FIN2	0.00529615	0.000278452	188.817	9.92729	0.23676	0.0234373		171.078	8.99467	0.23676	0.0234373
McK3-1b 119.FIN2	0.00444189	0.000196533	225.129	9.96091	0.145059	0.0169006		203.979	9.02513	0.145059	0.0169006
McK3-1b 120.FIN2	0.00461631	0.000209333	216.623	9.82309	0.147992	0.0145943		196.272	8.90025	0.147992	0.0145943
McK3-1b 121.FIN2	0.00457787	0.000217409	218.442	10.3741	0.129283	0.0135782		197.921	9.39951	0.129283	0.0135782
McK3-1b 122.FIN2	0.00434707	0.000210818	230.04	11.1562	0.095589	0.0122108		208.429	10.1081	0.095589	0.0122108
McK3-1b 123.FIN2	0.00428496	0.000214959	233.374	11.7074	0.137832	0.0151696		211.45	10.6075	0.137832	0.0151696
McK3-1b 124.FIN2	0.00439745	0.000186546	227.405	9.64681	0.0960862	0.0108553		206.041	8.74054	0.0960862	0.0108553
McK3-1b 125.FIN2	0.00402852	0.000150884	248.23	9.29717	0.0632372	0.0076026		224.91	8.42374	0.0632372	0.0076026
McK3-1b 126.FIN2	0.00417313	0.000169044	239.628	9.7068	0.0684354	0.00777984		217.116	8.79489	0.0684354	0.00777984
McK3-1b 127.FIN2	0.00541688	0.000251549	184.608	8.57282	0.31424	0.0270268		167.265	7.76744	0.31424	0.0270268
McK3-1b 128.FIN2	0.00529094	0.000220191	189.002	7.86565	0.25376	0.0186848		171.246	7.12671	0.25376	0.0186848
McK3-1b 129.FIN2	0.00441853	0.000213633	226.32	10.9424	0.11653	0.0150421		205.058	9.91441	0.11653	0.0150421		age without systematic uncertainties			age with propagation by quadratic addition
McK3-1b 130.FIN2	0.00445511	0.00021315	224.462	10.7391	0.0918117	0.0108875		203.374	9.73024	0.0918117	0.0108875		age	2σ (Ma)	2σ (%)	2σ (%)	2σ (abs) Ma	age and 2σ
McK3-1b 131.FIN2	0.00462209	0.000258072	216.352	12.0799	0.107263	0.0117599		196.027	10.945	0.107263	0.0117599		29.15	0.48	1.64666	3.57143	1.04107	29.15±1.0Ma
McK3-1b 132.FIN2	0.00450379	0.000210738	222.035	10.3893	0.0952508	0.0122167		201.176	9.41326	0.0952508	0.0122167
McK3-1b 133.FIN2	0.00888291	0.000464108	112.576	5.88177	0.513155	0.0381402		102	5.32921	0.513155	0.0381402
McK3-1b 134.FIN2	0.00483175	0.000247589	206.964	10.6053	0.157269	0.0172691		187.521	9.60897	0.157269	0.0172691
McK3-1b 135.FIN2	0.00453487	0.000205536	220.514	9.99445	0.0915457	0.0115993		199.797	9.05552	0.0915457	0.0115993
McK3-1b 136.FIN2	0.00430595	0.000207626	232.237	11.198	0.0812969	0.0125664		210.419	10.146	0.0812969	0.0125664
McK3-1b 137.FIN2	0.00430322	0.000206818	232.384	11.1687	0.10464	0.0130164		210.553	10.1194	0.10464	0.0130164
McK3-1b 138.FIN2	0.00419264	0.000187242	238.513	10.6519	0.0991353	0.0118549		216.106	9.65123	0.0991353	0.0118549
McK3-1b 139.FIN2	0.00412568	0.000182735	242.384	10.7357	0.0896167	0.0107164		219.613	9.72713	0.0896167	0.0107164
McK3-1b 140.FIN2	0.00456009	0.000250882	219.294	12.0649	0.16381	0.0171907		198.692	10.9314	0.16381	0.0171907
McK3-1b 141.FIN2	0.00444068	0.000212858	225.191	10.7942	0.114663	0.0136913		204.035	9.78015	0.114663	0.0136913
McK3-1b 142.FIN2	0.00457714	0.000200679	218.477	9.57886	0.153752	0.0137466		197.952	8.67897	0.153752	0.0137466
McK3-1b 143.FIN2	0.00465375	0.00024522	214.881	11.3227	0.122416	0.0126081		194.693	10.259	0.122416	0.0126081
McK3-1b 144.FIN2	0.00548303	0.000233515	182.381	7.76735	0.269909	0.0174834		165.247	7.03764	0.269909	0.0174834
McK3-1b 145.FIN2	0.00485506	0.00027109	205.971	11.5007	0.134696	0.0134055		186.621	10.4202	0.134696	0.0134055		age without systematic uncertainties			age with propagation by quadratic addition
McK3-1b 146.FIN2	0.00459664	0.000229431	217.55	10.8586	0.118288	0.0118747		197.112	9.83844	0.118288	0.0118747		age	2σ (Ma)	2σ (%)	2σ (%)	2σ (abs) Ma	age and 2σ
McK3-1b 147.FIN2	0.00459953	0.000193727	217.413	9.1572	0.107218	0.0109215		196.988	8.29692	0.107218	0.0109215		29.96	0.54	1.8024	3.64586	1.0923	29.96±1.1Ma
McK3-1b 148.FIN2	0.0045306	0.00019887	220.721	9.6885	0.101991	0.0107666		199.985	8.77831	0.101991	0.0107666
McK3-1b 149.FIN2	0.00574496	0.00026107	174.066	7.91011	0.275186	0.0182805		157.713	7.16699	0.275186	0.0182805
McK3-1b 150.FIN2	0.00465666	0.000207754	214.746	9.58074	0.151023	0.0127618		194.572	8.68067	0.151023	0.0127618
McK3-1b 151.FIN2	0.00728955	0.000320624	137.183	6.03384	0.404621	0.0238629		124.295	5.46699	0.404621	0.0238629
McK3-1b 152.FIN2	0.00647808	0.000318622	154.367	7.59247	0.349818	0.024508		139.865	6.87919	0.349818	0.024508
McK3-1b 153.FIN2	0.00645946	0.000334615	154.812	8.0196	0.350061	0.0326663		140.268	7.2662	0.350061	0.0326663
McK3-1b 154.FIN2	0.00451384	0.000205489	221.541	10.0854	0.110873	0.0117018		200.728	9.13796	0.110873	0.0117018
McK3-1b 155.FIN2	0.00460149	0.000198112	217.321	9.35652	0.104402	0.0125129		196.905	8.47751	0.104402	0.0125129
McK3-1b 156.FIN2	0.00463008	0.000210434	215.979	9.8161	0.133595	0.0124561		195.688	8.89392	0.133595	0.0124561
McK3-1b 157.FIN2	0.0049384	0.000219101	202.495	8.98404	0.18702	0.0143215		183.471	8.14003	0.18702	0.0143215
McK3-1b 158.FIN2	0.00747492	0.000327158	133.781	5.85524	0.437322	0.0266693		121.213	5.30517	0.437322	0.0266693
McK3-1b 159.FIN2	0.00492484	0.000205017	203.052	8.45288	0.155337	0.0133388		183.976	7.65877	0.155337	0.0133388
McK3-1b 160.FIN2	0.0044743	0.00020092	223.499	10.0363	0.114433	0.0107156		202.502	9.09343	0.114433	0.0107156
McK3-1b 161.FIN2	0.00456449	0.000198009	219.083	9.50387	0.134288	0.0125814		198.501	8.61102	0.134288	0.0125814		age without systematic uncertainties			age with propagation by quadratic addition
McK3-1b 162.FIN2	0.00444457	0.000208883	224.994	10.5741	0.110253	0.0117453		203.857	9.58071	0.110253	0.0117453		age	2σ (Ma)	2σ (%)	2σ (%)	2σ (abs) Ma	age and 2σ
McK3-1b 163.FIN2	0.00472214	0.000246869	211.769	11.071	0.206399	0.0216942		191.874	10.031	0.206399	0.0216942		28.64	0.49	1.71089	3.6015	1.03147	28.64±1.0Ma
McK3-1b 164.FIN2	0.00419305	0.000175963	238.49	10.0083	0.0770391	0.00994924		216.085	9.06805	0.0770391	0.00994924
McK3-1b 165.FIN2	0.00439929	0.000207087	227.309	10.7001	0.118077	0.0118334		205.955	9.69485	0.118077	0.0118334
McK3-1b 166.FIN2	0.00432235	0.000196068	231.355	10.4946	0.123378	0.0129518		209.621	9.50866	0.123378	0.0129518
McK3-1b 167.FIN2	0.00548506	0.000267313	182.313	8.88497	0.28585	0.0191523		165.186	8.05027	0.28585	0.0191523
McK3-1b 168.FIN2	0.0074714	0.000365067	133.844	6.53987	0.474166	0.0345036		121.27	5.92548	0.474166	0.0345036
McK3-1b 169.FIN2	0.00484882	0.000214938	206.236	9.14198	0.20821	0.0197864		186.861	8.28313	0.20821	0.0197864
McK3-1b 170.FIN2	0.00421938	0.000165592	237.002	9.30128	0.099762	0.0109103		214.737	8.42746	0.099762	0.0109103
McK3-1b 171.FIN2	0.00434086	0.000200698	230.369	10.651	0.0954769	0.011524		208.727	9.65039	0.0954769	0.011524
McK3-1b 172.FIN2	0.007709	0.000377777	129.718	6.3568	0.484879	0.0342378		117.532	5.75961	0.484879	0.0342378
McK3-1b 173.FIN2	0.00755278	0.000419845	132.401	7.35995	0.458939	0.0408687		119.963	6.66852	0.458939	0.0408687
McK3-1b 174.FIN2	0.00426191	0.000188707	234.637	10.3892	0.120636	0.0136		212.594	9.41316	0.120636	0.0136
McK3-1b 175.FIN2	0.00450791	0.000199932	221.832	9.83855	0.127441	0.0128852		200.992	8.91426	0.127441	0.0128852
McK3-1b 176.FIN2	0.00599321	0.000284373	166.855	7.91714	0.322587	0.0232961		151.18	7.17336	0.322587	0.0232961
McK3-1b 177.FIN2	0.00667306	0.000412303	149.856	9.25904	0.450843	0.0448809		135.778	8.3892	0.450843	0.0448809		age without systematic uncertainties			age with propagation by quadratic addition
McK3-1b 178.FIN2	0.00870047	0.000649984	114.936	8.58651	0.511396	0.0479697		104.138	7.77985	0.511396	0.0479697		age	2σ (Ma)	2σ (%)	2σ (%)	2σ (abs) Ma	age and 2σ
McK3-1b 179.FIN2	0.00869451	0.000506639	115.015	6.70205	0.493549	0.0368026		104.21	6.07242	0.493549	0.0368026		27.66	1.32	4.77223	5.72869	1.58456	27.66±1.6Ma
McK3-1b 180.FIN2	0.0130751	0.000630099	76.4814	3.68571	0.639855	0.0361373		69.2963	3.33945	0.639855	0.0361373
McK3-1b 181.FIN2	0.00956849	0.000554552	104.51	6.05697	0.568841	0.0490763		94.6915	5.48794	0.568841	0.0490763
McK3-1b 182.FIN2	0.00520895	0.000308683	191.977	11.3766	0.235194	0.0284018		173.942	10.3078	0.235194	0.0284018
McK3-1b 183.FIN2	0.00752395	0.000506063	132.909	8.9395	0.417443	0.0433984		120.423	8.09967	0.417443	0.0433984
McK3-1b 184.FIN2	0.00689086	0.000490846	145.12	10.3371	0.441156	0.0563952		131.486	9.36598	0.441156	0.0563952
McK3-1b 185.FIN2	0.00737886	0.000462416	135.522	8.49287	0.446333	0.0476292		122.791	7.695	0.446333	0.0476292
McK3-1b 186.FIN2	0.0060158	0.000377454	166.229	10.4299	0.351479	0.0398907		150.613	9.45002	0.351479	0.0398907
McK3-1b 187.FIN2	0.00627096	0.0004196	159.465	10.6701	0.423785	0.043785		144.484	9.66766	0.423785	0.043785
McK3-1b 188.FIN2	0.00661606	0.000386623	151.147	8.83262	0.382319	0.0347055		136.948	8.00283	0.382319	0.0347055
McK3-1b 189.FIN2	0.00492203	0.000245974	203.168	10.1532	0.212615	0.0249928		184.081	9.19932	0.212615	0.0249928
McK3-1b 190.FIN2	0.00563832	0.00033624	177.358	10.5767	0.306175	0.0339967		160.696	9.58304	0.306175	0.0339967
McK3-1b 191.FIN2	0.00647035	0.000395233	154.551	9.44057	0.412236	0.0429672		140.032	8.55367	0.412236	0.0429672
McK3-1b 192.FIN2	0.00642946	0.00038579	155.534	9.33258	0.424083	0.0466035		140.922	8.45583	0.424083	0.0466035
McK3-1b 193.FIN2	0.010293	0.00066111	97.1533	6.24006	0.628296	0.0764651		88.0262	5.65383	0.628296	0.0764651		age without systematic uncertainties			age with propagation by quadratic addition
McK3-1b 194.FIN2	0.0071814	0.000405077	139.249	7.85451	0.479992	0.0526096		126.167	7.11661	0.479992	0.0526096		age	2σ (Ma)	2σ (%)	2σ (%)	2σ (abs) Ma	age and 2σ
McK3-1b 195.FIN2	0.00590631	0.000382878	169.31	10.9756	0.36624	0.0474221		153.404	9.94446	0.36624	0.0474221		24.88	4.06	16.3183	16.6232	4.13586	24.88±4.1Ma
McK3-1b 196.FIN2	0.00721153	0.000477236	138.667	9.17653	0.407301	0.0469227		125.64	8.31444	0.407301	0.0469227
McK3-1b 197.FIN2	0.00758471	0.000457845	131.844	7.95867	0.517593	0.0560071		119.458	7.21099	0.517593	0.0560071
McK3-1b 198.FIN2	0.00829722	0.00050506	120.522	7.3363	0.487381	0.0434393		109.2	6.64709	0.487381	0.0434393
McK3-1b 199.FIN2	0.00792042	0.000543902	126.256	8.67009	0.480272	0.0549734		114.395	7.85558	0.480272	0.0549734
McK3-1b 200.FIN2	0.00726782	0.000436689	137.593	8.26731	0.435913	0.0533677		124.667	7.49064	0.435913	0.0533677
McK3-1b 201.FIN2	0.0131136	0.000806334	76.2566	4.68888	0.609237	0.0427579		69.0926	4.24838	0.609237	0.0427579
McK3-1b 202.FIN2	0.0068404	0.000389978	146.19	8.33447	0.443777	0.0408798		132.456	7.55148	0.443777	0.0408798
McK3-1b 203.FIN2	0.00754235	0.000502604	132.585	8.8351	0.491717	0.0535592		120.129	8.00508	0.491717	0.0535592
McK3-1b 204.FIN2	0.0112475	0.000648805	88.9089	5.12866	0.559899	0.0408674		80.5562	4.64685	0.559899	0.0408674
McK3-1b 205.FIN2	0.0071241	0.000421446	140.369	8.30391	0.392639	0.0358062		127.182	7.52379	0.392639	0.0358062
McK3-1b 206.FIN2	0.00786854	0.000515526	127.088	8.32649	0.540396	0.0547558		115.149	7.54426	0.540396	0.0547558
McK3-1b 207.FIN2	0.00733338	0.000451019	136.363	8.3866	0.531682	0.0658541		123.552	7.59871	0.531682	0.0658541
McK3-1b 208.FIN2	0.00711108	0.000461632	140.626	9.12905	0.411938	0.0554559		127.415	8.27142	0.411938	0.0554559
McK3-6
McK3-6 257.FIN2	0.00477766	0.000232581	209.308	10.1893	0.12706	0.0165659		189.644	9.23207	0.12706	0.0165659		age without systematic uncertainties			age with propagation by quadratic addition
McK3-6 258.FIN2	0.00474015	0.0002301	210.964	10.2408	0.140761	0.0156224		191.145	9.2787	0.140761	0.0156224		age	2σ (Ma)	2σ (%)	2σ (%)	2σ (abs) Ma	age and 2σ
McK3-6 259.FIN2	0.00478752	0.000241085	208.876	10.5183	0.12954	0.0153754		189.253	9.53019	0.12954	0.0153754		29.87	0.53	1.77436	3.63208	1.0849	29.87±1.1Ma
McK3-6 260.FIN2	0.0049725	0.000221499	201.106	8.9582	0.153642	0.0126301		182.213	8.11662	0.153642	0.0126301
McK3-6 261.FIN2	0.00442213	0.000209277	226.135	10.7019	0.0870134	0.0092368		204.891	9.69646	0.0870134	0.0092368
McK3-6 262.FIN2	0.00455127	0.000222264	219.719	10.7301	0.121379	0.0149207		199.077	9.72206	0.121379	0.0149207
McK3-6 263.FIN2	0.00458209	0.00026057	218.241	12.4107	0.130385	0.0171966		197.738	11.2448	0.130385	0.0171966
McK3-6 264.FIN2	0.00460492	0.000244987	217.159	11.5531	0.130174	0.0153232		196.758	10.4677	0.130174	0.0153232
McK3-6 265.FIN2	0.00459097	0.000238554	217.819	11.3182	0.140308	0.0136935		197.356	10.2549	0.140308	0.0136935
McK3-6 266.FIN2	0.00455233	0.00021602	219.668	10.4238	0.0850626	0.0100117		199.031	9.44453	0.0850626	0.0100117
McK3-6 267.FIN2	0.0046358	0.000217253	215.713	10.1092	0.0997201	0.0101133		195.447	9.15949	0.0997201	0.0101133
McK3-6 268.FIN2	0.00496719	0.000272493	201.321	11.0442	0.166981	0.0199717		182.408	10.0066	0.166981	0.0199717
McK3-6 269.FIN2	0.00635693	0.000264361	157.309	6.54188	0.354272	0.0214435		142.53	5.9273	0.354272	0.0214435
McK3-6 270.FIN2	0.00688874	0.00033162	145.165	6.98813	0.349264	0.0205354		131.527	6.33163	0.349264	0.0205354
McK3-6 271.FIN2	0.011299	0.000531551	88.5032	4.16355	0.535055	0.0251177		80.1887	3.7724	0.535055	0.0251177
McK3-6 272.FIN2	0.00652007	0.00029633	153.373	6.97063	0.333154	0.0190913		138.964	6.31577	0.333154	0.0190913
McK3-6 273.FIN2	0.00496178	0.000264995	201.54	10.7637	0.14789	0.0165387		182.607	9.7525	0.14789	0.0165387		age without systematic uncertainties			age with propagation by quadratic addition
McK3-6 274.FIN2	0.00445479	0.00021746	224.478	10.9579	0.0872875	0.010793		203.389	9.92843	0.0872875	0.010793		age	2σ (Ma)	2σ (%)	2σ (%)	2σ (abs) Ma	age and 2σ
McK3-6 275.FIN2	0.00435285	0.000205498	229.735	10.8458	0.098077	0.0124481		208.152	9.82687	0.098077	0.0124481		30.1	1.02	3.3887	4.63972	1.39656	30.1±1.4Ma
McK3-6 276.FIN2	0.00476867	0.000244053	209.702	10.7322	0.132381	0.0146957		190.001	9.72396	0.132381	0.0146957
McK3-6 277.FIN2	0.0046564	0.000228416	214.758	10.5348	0.105701	0.0133277		194.582	9.54506	0.105701	0.0133277
McK3-6 278.FIN2	0.00473966	0.000223335	210.986	9.94174	0.11965	0.0157459		191.164	9.00776	0.11965	0.0157459
McK3-6 279.FIN2	0.00451064	0.000210552	221.698	10.3486	0.10657	0.0124142		200.871	9.37643	0.10657	0.0124142
McK3-6 280.FIN2	0.00459669	0.000230871	217.548	10.9264	0.146675	0.0190441		197.11	9.89995	0.146675	0.0190441
McK3-6 281.FIN2	0.00472731	0.00023321	211.537	10.4356	0.113777	0.0133508		191.664	9.45525	0.113777	0.0133508
McK3-6 282.FIN2	0.00461521	0.000242719	216.675	11.3952	0.0929851	0.012288		196.319	10.3247	0.0929851	0.012288
McK3-6 283.FIN2	0.0046178	0.000212568	216.553	9.96844	0.0939166	0.0111865		196.209	9.03194	0.0939166	0.0111865
McK3-6 284.FIN2	0.00443974	0.000209517	225.239	10.6293	0.109459	0.0124088		204.078	9.63074	0.109459	0.0124088
McK3-6 285.FIN2	0.00441678	0.00019424	226.409	9.95695	0.0902774	0.0098001		205.139	9.02154	0.0902774	0.0098001
McK3-6 286.FIN2	0.00468888	0.000237821	213.271	10.8171	0.160043	0.0192377		193.235	9.80092	0.160043	0.0192377
McK3-6 287.FIN2	0.00429418	0.000180762	232.873	9.80274	0.0600819	0.00615888		210.996	8.88181	0.0600819	0.00615888
McK3-6 288.FIN2	0.00492448	0.000234896	203.067	9.68626	0.123938	0.014994		183.99	8.77627	0.123938	0.014994
McK3-7
McK3-7 1.FIN2	0.00522422	0.000207509	191.416	7.60316	0.273942	0.0222242		173.433	6.88887	0.273942	0.0222242		age without systematic uncertainties			age with propagation by quadratic addition
McK3-7 2.FIN2	0.00569641	0.000335167	175.549	10.329	0.28104	0.0365687		159.057	9.35866	0.28104	0.0365687		age	2σ (Ma)	2σ (%)	2σ (%)	2σ (abs) Ma	age and 2σ
McK3-7 3.FIN2	0.00474346	0.000223508	210.817	9.93351	0.208769	0.0270103		191.011	9.0003	0.208769	0.0270103		28	0.82	2.92857	4.31511	1.20823	27.92±1.0Ma
McK3-7 4.FIN2	0.00434436	0.000145328	230.183	7.70014	0.102954	0.0102688		208.559	6.97675	0.102954	0.0102688
McK3-7 5.FIN2	0.0116406	0.000552516	85.9065	4.07753	0.600721	0.0434056		77.8359	3.69446	0.600721	0.0434056
McK3-7 6.FIN2	0.00952776	0.000417159	104.956	4.59536	0.517464	0.0394243		95.0963	4.16365	0.517464	0.0394243
McK3-7 7.FIN2	0.0236882	0.00112063	42.2151	1.9971	0.762598	0.0582039		38.2492	1.80948	0.762598	0.0582039
McK3-7 8.FIN2	0.0051787	0.000245934	193.099	9.17019	0.26825	0.0259657		174.958	8.30869	0.26825	0.0259657
McK3-7 9.FIN2	0.00759228	0.000333281	131.713	5.78183	0.417631	0.0268298		119.339	5.23866	0.417631	0.0268298
McK3-7 10.FIN2	0.00417226	0.000144045	239.678	8.27477	0.0923474	0.00954011		217.161	7.49739	0.0923474	0.00954011
McK3-7 11.FIN2	0.00453109	0.000194357	220.697	9.46663	0.183362	0.0212706		199.964	8.57728	0.183362	0.0212706
McK3-7 12.FIN2	0.00485016	0.00020442	206.179	8.68984	0.195646	0.0176941		186.809	7.87347	0.195646	0.0176941
McK3-7 13.FIN2	0.00423303	0.000169252	236.237	9.44563	0.108106	0.0178246		214.044	8.55825	0.108106	0.0178246
McK3-7 14.FIN2	0.005109	0.000238628	195.733	9.14219	0.217047	0.0181046		177.345	8.28332	0.217047	0.0181046
McK3-7 15.FIN2	0.0158317	0.00160934	63.1643	6.42081	1.04406	0.192561		57.2303	5.81761	1.04406	0.192561
McK3-7 16.FIN2	0.00836587	0.00043766	119.533	6.25338	0.448032	0.0318367		108.304	5.6659	0.448032	0.0318367
McK3-7 17.FIN2	0.00436883	0.000194459	228.894	10.1882	0.100891	0.0127014		207.391	9.23106	0.100891	0.0127014		age without systematic uncertainties			age with propagation by quadratic addition
McK3-7 18.FIN2	0.00439639	0.000196483	227.459	10.1656	0.0975535	0.0111238		206.09	9.21057	0.0975535	0.0111238		age	2σ (Ma)	2σ (%)	2σ (%)	2σ (abs) Ma	age and 2σ
McK3-7 19.FIN2	0.00454834	0.000249177	219.86	12.0449	0.136308	0.0173813		199.206	10.9133	0.136308	0.0173813		29.34	0.56	1.90866	3.69955	1.08545	29.31±1.1Ma
McK3-7 20.FIN2	0.00499447	0.000266181	200.222	10.6709	0.209097	0.0186316		181.412	9.66837	0.209097	0.0186316
McK3-7 21.FIN2	0.00440161	0.000220489	227.189	11.3805	0.123772	0.0152466		205.846	10.3114	0.123772	0.0152466
McK3-7 22.FIN2	0.00446209	0.000211966	224.11	10.6461	0.103691	0.0169112		203.056	9.64595	0.103691	0.0169112
McK3-7 23.FIN2	0.00497597	0.000251945	200.966	10.1754	0.186725	0.0141282		182.086	9.21946	0.186725	0.0141282
McK3-7 24.FIN2	0.00468206	0.000235107	213.581	10.7248	0.155788	0.0164126		193.516	9.71728	0.155788	0.0164126
McK3-7 25.FIN2	0.00435034	0.000198649	229.867	10.4964	0.0981907	0.0112959		208.272	9.51029	0.0981907	0.0112959
McK3-7 26.FIN2	0.007051	0.000364133	141.824	7.32416	0.419244	0.035249		128.5	6.63609	0.419244	0.035249
McK3-7 27.FIN2	0.00462037	0.00025312	216.433	11.857	0.118573	0.0129344		196.1	10.7431	0.118573	0.0129344
McK3-7 28.FIN2	0.00767501	0.000547938	130.293	9.30195	0.606355	0.116625		118.053	8.42807	0.606355	0.116625
McK3-7 29.FIN2	0.0306182	0.0027552	32.6603	2.93896	0.683316	0.360284		29.592	2.66286	0.683316	0.360284	Too large uncertainty
McK3-7 30.FIN2	0.0125957	0.00152812	79.3921	9.6319	0.806323	0.302027		71.9336	8.72702	0.806323	0.302027
McK3-7 31.FIN2	0.00413808	0.000178306	241.658	10.4128	0.0974738	0.0128511		218.955	9.4346	0.0974738	0.0128511
McK3-7 32.FIN2	0.00666922	0.000467734	149.943	10.5159	0.456935	0.0440997		135.856	9.52802	0.456935	0.0440997
McK3-7 33.FIN2	0.00456019	0.000214299	219.289	10.3052	0.144598	0.0148925		198.688	9.33703	0.144598	0.0148925		age without systematic uncertainties			age with propagation by quadratic addition
McK3-7 34.FIN2	0.00489167	0.000239352	204.429	10.0028	0.195401	0.0143743		185.224	9.0631	0.195401	0.0143743		age	2σ (Ma)	2σ (%)	2σ (%)	2σ (abs) Ma	age and 2σ
McK3-7 35.FIN2	0.00469844	0.000208273	212.837	9.43466	0.146905	0.0145264		192.842	8.54832	0.146905	0.0145264		28.72	0.56	1.94986	3.72097	1.06866	28.72±1.1Ma
McK3-7 36.FIN2	0.00711511	0.000469889	140.546	9.2818	0.41892	0.0517701		127.342	8.40981	0.41892	0.0517701
McK3-7 37.FIN2	0.00425094	0.000187184	235.242	10.3586	0.0940472	0.0117016		213.142	9.38542	0.0940472	0.0117016
McK3-7 38.FIN2	0.00495476	0.000261145	201.826	10.6374	0.189516	0.0167162		182.865	9.63807	0.189516	0.0167162
McK3-7 39.FIN2	0.0048116	0.000221084	207.831	9.54942	0.193417	0.0197188		188.306	8.65229	0.193417	0.0197188
McK3-7 40.FIN2	0.00429142	0.000168823	233.023	9.16706	0.103436	0.0115175		211.132	8.30585	0.103436	0.0115175
McK3-7 41.FIN2	0.00425791	0.000194225	234.857	10.713	0.0987006	0.0127793		212.793	9.70659	0.0987006	0.0127793
McK3-7 42.FIN2	0.00510935	0.000226749	195.72	8.68589	0.190162	0.0178076		177.333	7.86989	0.190162	0.0178076
McK3-7 43.FIN2	0.0055533	0.000269893	180.073	8.75163	0.300269	0.0218587		163.156	7.92945	0.300269	0.0218587
McK3-7 44.FIN2	0.00826865	0.000413887	120.939	6.05359	0.491748	0.0308734		109.577	5.48488	0.491748	0.0308734
McK3-7 45.FIN2	0.00622191	0.000338346	160.722	8.74005	0.333182	0.0587588		145.623	7.91896	0.333182	0.0587588
McK3-7 46.FIN2	0.0043256	0.000188838	231.182	10.0924	0.0944094	0.010677		209.463	9.14431	0.0944094	0.010677
McK3-7 47.FIN2	0.00611898	0.000308081	163.426	8.22824	0.345794	0.0362909		148.073	7.45523	0.345794	0.0362909
McK3-7 48.FIN2	0.0043209	0.000218883	231.433	11.7237	0.135591	0.0157501		209.691	10.6223	0.135591	0.0157501
McK3-7 49.FIN2	0.0056333	0.000265935	177.516	8.3801	0.225504	0.0193408		160.839	7.59283	0.225504	0.0193408		age without systematic uncertainties			age with propagation by quadratic addition
McK3-7 50.FIN2	0.00582475	0.000282317	171.681	8.32113	0.302643	0.0246012		155.553	7.5394	0.302643	0.0246012		age	2σ (Ma)	2σ (%)	2σ (%)	2σ (abs) Ma	age and 2σ
McK3-7 51.FIN2	0.00452814	0.000199019	220.841	9.70636	0.121309	0.0109483		200.094	8.79449	0.121309	0.0109483		29.36	0.56	1.90736	3.69887	1.08599	29.36±1.1Ma
McK3-7 52.FIN2	0.00464631	0.000209619	215.225	9.70988	0.130422	0.0137207		195.005	8.79768	0.130422	0.0137207
McK3-7 53.FIN2	0.00476648	0.000217962	209.798	9.59367	0.149219	0.0176014		190.089	8.69238	0.149219	0.0176014
McK3-7 54.FIN2	0.00490502	0.000255007	203.873	10.5991	0.169702	0.0187447		184.72	9.6034	0.169702	0.0187447
McK3-7 55.FIN2	0.00519411	0.000234248	192.526	8.68269	0.257363	0.024647		174.439	7.86699	0.257363	0.024647
McK3-7 56.FIN2	0.00497433	0.000224252	201.032	9.06289	0.184673	0.0166196		182.146	8.21147	0.184673	0.0166196
McK3-7 57.FIN2	0.0503752	0.00264622	19.851	1.04278	0.864024	0.0652004		17.9861	0.944812	0.864024	0.0652004
McK3-7 58.FIN2	0.00574965	0.000281144	173.924	8.50444	0.321732	0.0228704		157.584	7.70548	0.321732	0.0228704
McK3-7 59.FIN2	0.00446108	0.000194554	224.161	9.77597	0.128557	0.0139297		203.102	8.85756	0.128557	0.0139297
McK3-7 60.FIN2	0.00553668	0.00025566	180.614	8.33997	0.310855	0.025717		163.646	7.55646	0.310855	0.025717
McK3-7 61.FIN2	0.00433541	0.000176758	230.659	9.40417	0.110364	0.0111575		208.99	8.52069	0.110364	0.0111575
McK3-7 62.FIN2	0.00575604	0.000273631	173.73	8.25882	0.330894	0.0292394		157.409	7.48294	0.330894	0.0292394
McK3-7 63.FIN2	0.00790714	0.000398353	126.468	6.37133	0.473261	0.0337012		114.587	5.77277	0.473261	0.0337012
McK3-7 64.FIN2	0.00527031	0.000250833	189.742	9.03049	0.23314	0.0202052		171.917	8.18212	0.23314	0.0202052
McK3-7 65.FIN2	0.00902182	0.000464689	110.842	5.70919	0.521289	0.0385229		100.429	5.17283	0.521289	0.0385229		age without systematic uncertainties			age with propagation by quadratic addition
McK3-7 66.FIN2	0.00427783	0.000190555	233.763	10.4129	0.074981	0.00807473		211.802	9.43467	0.074981	0.00807473		age	2σ (Ma)	2σ (%)	2σ (%)	2σ (abs) Ma	age and 2σ
McK3-7 67.FIN2	0.00465132	0.00022671	214.993	10.479	0.135559	0.0118919		194.795	9.4945	0.135559	0.0118919		28.99	0.44	1.51776	3.51387	1.01867	28.99±1.0Ma
McK3-7 68.FIN2	0.00479596	0.000225908	208.509	9.82156	0.176031	0.0162164		188.92	8.89887	0.176031	0.0162164
McK3-7 69.FIN2	0.0049033	0.000225647	203.944	9.38541	0.212253	0.0168181		184.785	8.5037	0.212253	0.0168181
McK3-7 70.FIN2	0.00491649	0.000210579	203.397	8.71174	0.225397	0.0213526		184.289	7.89331	0.225397	0.0213526
McK3-7 71.FIN2	0.00412087	0.000161289	242.667	9.49792	0.0695297	0.00688015		219.87	8.60563	0.0695297	0.00688015
McK3-7 72.FIN2	0.00437947	0.000192549	228.338	10.0392	0.0997286	0.00976365		206.887	9.09605	0.0997286	0.00976365
McK3-7 73.FIN2	0.0150482	0.000715081	66.4529	3.15779	0.676948	0.0386709		60.21	2.86113	0.676948	0.0386709
McK3-7 74.FIN2	0.00569636	0.000250193	175.551	7.71048	0.314934	0.0209974		159.059	6.98611	0.314934	0.0209974
McK3-7 75.FIN2	0.00510957	0.000194305	195.711	7.44245	0.213509	0.0165141		177.325	6.74327	0.213509	0.0165141
McK3-7 76.FIN2	0.0048221	0.000235776	207.379	10.1398	0.206352	0.0230644		187.896	9.18718	0.206352	0.0230644
McK3-7 77.FIN2	0.00422406	0.000187856	236.739	10.5285	0.0847376	0.00934982		214.498	9.53937	0.0847376	0.00934982
McK3-7 78.FIN2	0.00505457	0.00022855	197.841	8.94568	0.19264	0.0166198		179.254	8.10527	0.19264	0.0166198
McK3-7 79.FIN2	0.00455042	0.000199273	219.76	9.62381	0.122506	0.0132215		199.115	8.7197	0.122506	0.0132215
McK3-7 80.FIN2	0.00437551	0.000173767	228.545	9.07634	0.0856685	0.00854665		207.074	8.22366	0.0856685	0.00854665
McK3-7 81.FIN2	0.00440964	0.000194363	226.776	9.99555	0.122636	0.0155535		205.471	9.05651	0.122636	0.0155535		age without systematic uncertainties			age with propagation by quadratic addition
McK3-7 82.FIN2	0.00425801	0.000168084	234.851	9.27071	0.0999909	0.010777		212.788	8.39976	0.0999909	0.010777		age	2σ (Ma)	2σ (%)	2σ (%)	2σ (abs) Ma	age and 2σ
McK3-7 83.FIN2	0.004266	0.000166527	234.411	9.15043	0.105668	0.0105789		212.389	8.29079	0.105668	0.0105789		29.01	0.7	2.41296	3.98322	1.15553	29.01±1.2Ma
McK3-7 84.FIN2	0.00413095	0.000144089	242.075	8.44367	0.0769401	0.00798906		219.333	7.65042	0.0769401	0.00798906
McK3-7 85.FIN2	0.00461977	0.000193088	216.461	9.0472	0.150839	0.0130039		196.125	8.19725	0.150839	0.0130039
McK3-7 86.FIN2	0.00457981	0.000206119	218.349	9.82705	0.161399	0.0163009		197.836	8.90384	0.161399	0.0163009
McK3-7 87.FIN2	0.00459637	0.000201581	217.563	9.54154	0.147511	0.0140605		197.124	8.64515	0.147511	0.0140605
McK3-7 88.FIN2	0.00432925	0.000186944	230.987	9.97442	0.125889	0.0133084		209.287	9.03736	0.125889	0.0133084
McK3-7 89.FIN2	0.00458287	0.000213002	218.204	10.1416	0.13256	0.0151883		197.705	9.18887	0.13256	0.0151883
McK3-7 90.FIN2	0.00434986	0.000182292	229.892	9.63424	0.0919331	0.00938411		208.295	8.72914	0.0919331	0.00938411
McK3-7 91.FIN2	0.00441107	0.000163795	226.702	8.41807	0.0697401	0.00681843		205.405	7.62723	0.0697401	0.00681843
McK3-7 92.FIN2	0.00438005	0.000183997	228.308	9.59074	0.134951	0.0139482		206.859	8.68973	0.134951	0.0139482
McK3-7 93.FIN2	0.00444617	0.000187549	224.913	9.48729	0.12591	0.0135194		203.783	8.596	0.12591	0.0135194
McK3-7 94.FIN2	0.00495793	0.000210813	201.697	8.57624	0.204535	0.0168007		182.749	7.77054	0.204535	0.0168007
McK3-7 95.FIN2	0.0043053	0.000216235	232.272	11.6659	0.0990155	0.0143571		210.451	10.57	0.0990155	0.0143571
McK3-7 96.FIN2	0.00437794	0.000191215	228.418	9.97661	0.103091	0.0108804		206.959	9.03935	0.103091	0.0108804
12/07/2022 n°2
UNCERTAINTIES OF NIST614 DURING SESSION
2σ NIST 614 Raw 206/238 (%)	1.8
2σ NIST 614 Raw 207/206 (%)	0.47
WC-1 (%)	2.56569
correction factor	0.801172
McK3-1a
McK3 1a 1.FIN2	0.00654709	0.000493851	152.74	11.5213	0.719178	0.335676		122.371	9.2305	0.719178	0.335676		age without systematic uncertainties			age with propagation by quadratic addition
McK3 1a 2.FIN2	0.00754244	0.000376645	132.583	6.62077	0.504823	0.0443186		106.222	5.30437	0.504823	0.0443186		age	2σ (Ma)	2σ (%)	2σ (%)	2σ (abs) Ma	age and 2σ
McK3 1a 3.FIN2	0.0271071	0.00190515	36.8907	2.59275	0.789378	0.0459925		29.5558	2.07724	0.789378	0.0459925		30.29	2.81	9.27699	9.80338	2.96944	30.54±2.1Ma
McK3 1a 4.FIN2	0.289005	0.0172331	3.46015	0.206325	0.881055	0.0448126		2.77217	0.165302	0.881055	0.0448126
McK3 1a 5.FIN2	0.00942327	0.000517462	106.12	5.8274	0.574282	0.0462107		85.0205	4.66875	0.574282	0.0462107
McK3 1a 6.FIN2	0.00660537	0.000356468	151.392	8.17009	0.363734	0.0255004		121.291	6.54564	0.363734	0.0255004
McK3 1a 7.FIN2	0.0158131	0.0010674	63.2386	4.26866	0.713414	0.0583877		50.6649	3.41993	0.713414	0.0583877
McK3 1a 8.FIN2	0.0102255	0.000749073	97.7943	7.16392	0.594513	0.0505118		78.35	5.73953	0.594513	0.0505118
McK3 1a 9.FIN2	0.0159086	0.00127554	62.859	5.03996	0.722929	0.0669505		50.3608	4.03787	0.722929	0.0669505
McK3 1a 10.FIN2	0.0133322	0.000711439	75.0061	4.0025	0.656868	0.0516514		60.0928	3.20669	0.656868	0.0516514
McK3 1a 11.FIN2	0.0731512	0.00599248	13.6703	1.11986	0.827709	0.0352776		10.9523	0.8972	0.827709	0.0352776
McK3 1a 12.FIN2	0.00869759	0.000684658	114.974	9.05055	0.546417	0.0502003		92.1142	7.25105	0.546417	0.0502003
McK3 1a 13.FIN2	0.0187586	0.0014989	53.3089	4.25965	0.700849	0.0527747		42.7096	3.41271	0.700849	0.0527747
McK3 1a 14.FIN2	0.0103403	0.000506004	96.7094	4.73252	0.583002	0.0379667		77.4809	3.79156	0.583002	0.0379667
McK3 1a 15.FIN2	0.00744762	0.00180216	134.271	32.4906	1.40318	0.526469		107.574	26.0305	1.40318	0.526469
McK3 1a 16.FIN2	0.0100157	0.00217178	99.8428	21.6496	0.454931	0.110328		79.9912	17.3451	0.454931	0.110328
McK3 1a 17.FIN2	0.00668813	0.000396478	149.519	8.86359	0.410586	0.0348246		119.79	7.10126	0.410586	0.0348246		age without systematic uncertainties			age with propagation by quadratic addition
McK3 1a 18.FIN2	0.00649616	0.000354473	153.937	8.39981	0.360919	0.029762		123.33	6.72969	0.360919	0.029762		age	2σ (Ma)	2σ (%)	2σ (%)	2σ (abs) Ma	age and 2σ
McK3 1a 19.FIN2	0.00687557	0.000463944	145.443	9.81405	0.453028	0.0553029		116.524	7.86274	0.453028	0.0553029		31.08	1.47	4.72973	5.69333	1.76949	31.08±1.8Ma
McK3 1a 20.FIN2	0.00572753	0.000403045	174.595	12.2862	0.352941	0.0332322		139.881	9.84336	0.352941	0.0332322
McK3 1a 21.FIN2	0.00818783	0.000489668	122.132	7.30405	0.526999	0.0497271		97.849	5.85179	0.526999	0.0497271
McK3 1a 22.FIN2	0.00658399	0.00043042	151.884	9.92919	0.568909	0.138557		121.685	7.95499	0.568909	0.138557
McK3 1a 23.FIN2	0.00511483	0.000313696	195.51	11.9907	0.214612	0.0203941		156.637	9.60664	0.214612	0.0203941
McK3 1a 24.FIN2	0.141332	0.0126394	7.07553	0.632766	0.82826	0.0521884		5.66871	0.506954	0.82826	0.0521884
McK3 1a 25.FIN2	0.0262389	0.00205247	38.1114	2.98116	0.821727	0.0609975		30.5338	2.38842	0.821727	0.0609975
McK3 1a 26.FIN2	0.00527363	0.000374376	189.623	13.4613	0.257898	0.0241701		151.92	10.7848	0.257898	0.0241701
McK3 1a 27.FIN2	0.00531332	0.000337194	188.206	11.944	0.305329	0.0274277		150.786	9.56916	0.305329	0.0274277
McK3 1a 28.FIN2	0.00710791	0.000423539	140.688	8.38321	0.420768	0.0403659		112.716	6.71639	0.420768	0.0403659
McK3 1a 29.FIN2	0.00449772	0.00022757	222.335	11.2494	0.161801	0.0158693		178.128	9.0127	0.161801	0.0158693
McK3 1a 30.FIN2	0.00642837	0.000522617	155.56	12.6468	0.41369	0.046181		124.631	10.1323	0.41369	0.046181
McK3 1a 31.FIN2	0.008946	0.000548767	111.782	6.85693	0.581786	0.0533357		89.5564	5.49358	0.581786	0.0533357
McK3 1a 32.FIN2	0.00790078	0.000978624	126.57	15.6775	0.568536	0.113489		101.404	12.5603	0.568536	0.113489
McK3 1a 33.FIN2	0.00461461	0.000248757	216.703	11.6817	0.21325	0.0203619		173.616	9.35902	0.21325	0.0203619
McK3 1a 34.FIN2	0.00566991	0.000385412	176.37	11.9887	0.325902	0.0333792		141.302	9.60503	0.325902	0.0333792		age without systematic uncertainties			age with propagation by quadratic addition
McK3 1a 35.FIN2	0.00408737	0.000213428	244.656	12.7751	0.123396	0.0145567		196.011	10.235	0.123396	0.0145567		age	2σ (Ma)	2σ (%)	2σ (%)	2σ (abs) Ma	age and 2σ
McK3 1a 36.FIN2	0.00459012	0.00023886	217.859	11.3369	0.130565	0.0140546		174.542	9.08282	0.130565	0.0140546		31.97	0.73	2.28339	3.90609	1.24878	31.97±1.2Ma
McK3 1a 37.FIN2	0.0045806	0.000265595	218.312	12.6583	0.174737	0.0182598		174.906	10.1415	0.174737	0.0182598
McK3 1a 38.FIN2	0.00447018	0.000235294	223.704	11.775	0.149534	0.0156619		179.226	9.43379	0.149534	0.0156619
McK3 1a 39.FIN2	0.00675659	0.000327626	148.004	7.17668	0.451512	0.042231		118.576	5.74975	0.451512	0.042231
McK3 1a 40.FIN2	0.0123765	0.0013501	80.7984	8.81394	0.996036	0.528024		64.7334	7.06148	0.996036	0.528024
McK3 1a 41.FIN2	0.00484098	0.00026852	206.57	11.458	0.18196	0.0183312		165.498	9.17986	0.18196	0.0183312
McK3 1a 42.FIN2	0.00451173	0.000262288	221.644	12.8852	0.141625	0.0174638		177.575	10.3233	0.141625	0.0174638
McK3 1a 43.FIN2	0.00399934	0.000216027	250.041	13.5062	0.0847068	0.0109838		200.326	10.8207	0.0847068	0.0109838
McK3 1a 44.FIN2	0.00425576	0.000211827	234.976	11.6958	0.114182	0.0129998		188.256	9.37031	0.114182	0.0129998
McK3 1a 45.FIN2	0.00429971	0.000225276	232.574	12.1853	0.0991178	0.0128777		186.331	9.76252	0.0991178	0.0128777
McK3 1a 46.FIN2	0.00420768	0.000206296	237.661	11.6521	0.109379	0.0147999		190.407	9.33534	0.109379	0.0147999
McK3 1a 47.FIN2	0.00463081	0.000288962	215.945	13.475	0.168584	0.0183859		173.009	10.7958	0.168584	0.0183859
McK3 1a 48.FIN2	0.00460997	0.000251353	216.921	11.8273	0.141159	0.0177623		173.791	9.47573	0.141159	0.0177623

## Sheet: Standard
2021-09-03
UNCERTAINTIES OF NIST614 DURING SESSION
2σ NIST 614 Raw 206/238 (%)	1
2σ NIST 614 Raw 207/206 (%)	0.33
WC-1 (%)	2.56569
correction factor	0.881142
	Pb206/U238_mean	Pb206/U238_2SE(int)	U238/Pb206	U238/Pb206_2SE	DC Pb207/Pb206_mean	DC Pb207/Pb206_2SE(int)		WC-1 corrected 238U/206Pb	2SE	207Pb/206Pb	2SE	Reasons to delete the data for Isoplot built
WC1													Before correction
WC1 1.FIN2	0.0421092	0.00128696	23.7478	0.725791	0.177116	0.0126497		20.9252	0.639525	0.177116	0.0126497		age without systematic uncertainties
WC1 2.FIN2	0.040946	0.00135677	24.4224	0.809254	0.152327	0.0100796		21.5196	0.713068	0.152327	0.0100796		age	2σ (Ma)	2σ (%)
WC1 3.FIN2	0.0401655	0.00118466	24.897	0.734325	0.143379	0.00619158		21.9378	0.647045	0.143379	0.00619158		229.4	3.71	1.61726
WC1 4.FIN2	0.0632978	0.00226484	15.7983	0.565275	0.276264	0.00983221		13.9206	0.498088	0.276264	0.00983221
WC1 21.FIN2	0.0439421	0.00173912	22.7572	0.900672	0.154063	0.00938839		20.0523	0.79362	0.154063	0.00938839
WC1 1.FIN2	0.0396597	0.00103602	25.2145	0.658675	0.13043	0.00420494		22.2176	0.580386	0.13043	0.00420494		After correction
WC1 2.FIN2	0.0380248	0.00117506	26.2987	0.812695	0.099738	0.00414658		23.1728	0.7161	0.099738	0.00414658		age without systematic uncertainties			age with propagation by quadratic addition
WC1 3.FIN2	0.038913	0.00115908	25.6983	0.76546	0.11255	0.00534376		22.6439	0.674479	0.11255	0.00534376		age	2σ (Ma)	2σ (%)	2σ (%)	2σ (abs) Ma	age and 2σ
WC1 4.FIN2	0.040809	0.00190062	24.5044	1.14126	0.113999	0.0050652		21.5919	1.00561	0.113999	0.0050652		259.94	4.2	1.61576	3.20973	8.34336	259.94±4.2Ma
WC1 5.FIN2	0.0394961	0.00144336	25.3189	0.925266	0.0999934	0.00433163		22.3096	0.81529	0.0999934	0.00433163
WC1 6.FIN2	0.0397141	0.00146063	25.18	0.926084	0.113714	0.00491559		22.1871	0.816012	0.113714	0.00491559
WC1 7.FIN2	0.038818	0.00131678	25.7613	0.873872	0.110476	0.00444764		22.6993	0.770005	0.110476	0.00444764
WC1 8.FIN2	0.0397278	0.00142846	25.1713	0.905067	0.0965534	0.00369344		22.1795	0.797492	0.0965534	0.00369344
WC1 9.FIN2	0.0372069	0.00109294	26.8768	0.789499	0.0843176	0.00343599		23.6823	0.695661	0.0843176	0.00343599
WC1 10.FIN2	0.0390479	0.00126968	25.6096	0.832721	0.096685	0.00422156		22.5657	0.733745	0.096685	0.00422156
WC1 11.FIN2	0.0397804	0.00130621	25.138	0.825417	0.104241	0.00540622		22.1501	0.72731	0.104241	0.00540622
WC1 12.FIN2	0.0381279	0.00126499	26.2275	0.870161	0.107732	0.00481506		23.1101	0.766735	0.107732	0.00481506
WC1 13.FIN2	0.0357242	0.00135969	27.9923	1.06541	0.0786202	0.0033076		24.6652	0.938776	0.0786202	0.0033076
WC1 14.FIN2	0.0383758	0.00110416	26.0581	0.749752	0.0968085	0.00429022		22.9609	0.660638	0.0968085	0.00429022
WC1 15.FIN2	0.0388621	0.00119873	25.732	0.793722	0.100972	0.00611976		22.6736	0.699382	0.100972	0.00611976
WC1 16.FIN2	0.0370668	0.00128579	26.9783	0.935834	0.0800815	0.00409699		23.7717	0.824603	0.0800815	0.00409699
WC1 17.FIN2	0.0386265	0.0014046	25.889	0.941415	0.102239	0.00527436		22.8119	0.829521	0.102239	0.00527436
WC1 18.FIN2	0.0381705	0.00136705	26.1982	0.938269	0.104856	0.00528434		23.0844	0.826748	0.104856	0.00528434
WC1 19.FIN2	0.0370464	0.00139567	26.9932	1.01693	0.0936646	0.00488433		23.7848	0.896059	0.0936646	0.00488433
WC1 20.FIN2	0.0382067	0.00130144	26.1734	0.891547	0.0934228	0.00468947		23.0625	0.78558	0.0934228	0.00468947
WC1 21.FIN2	0.0394466	0.00141511	25.3508	0.909437	0.118222	0.00567382		22.3376	0.801343	0.118222	0.00567382
B6
B6 1.FIN2	0.00607641	0.000204667	164.571	5.54313	0.0957188	0.00699031		145.01	4.88428	0.0957188	0.00699031		age without systematic uncertainties			age with propagation by quadratic addition
B6 2.FIN2	0.0139515	0.000773705	71.6767	3.97494	0.564052	0.0423019		63.1573	3.50249	0.564052	0.0423019		age	2σ (Ma)	2σ (%)	2σ (%)	2σ (abs) Ma	age and 2σ
B6 3.FIN2	0.0160117	0.00112608	62.4543	4.39231	0.656047	0.079405		55.0311	3.87025	0.656047	0.079405		42.41	0.66	1.55624	3.18018	1.34871	42.41±1.3Ma
B6 4.FIN2	0.00724605	0.000453822	138.006	8.64336	0.202382	0.0230986		121.603	7.61602	0.202382	0.0230986
B6 5.FIN2	0.00773511	0.000300807	129.281	5.02753	0.238399	0.0142489		113.915	4.42997	0.238399	0.0142489
B6 6.FIN2	0.00771209	0.000411969	129.667	6.92661	0.261754	0.0269393		114.255	6.10333	0.261754	0.0269393
B6 7.FIN2	0.0107681	0.000821781	92.867	7.08727	0.44396	0.0480502		81.829	6.24489	0.44396	0.0480502
B6 8.FIN2	0.0735012	0.00323875	13.6052	0.5995	0.795507	0.0355207		11.9881	0.528245	0.795507	0.0355207
B6 41.FIN2	0.00631531	0.00029637	158.345	7.43096	0.128347	0.0126452		139.525	6.54773	0.128347	0.0126452
B6 42.FIN2	0.0106859	0.000389935	93.5809	3.41481	0.394785	0.0177431		82.4581	3.00893	0.394785	0.0177431
B6 1.FIN2	0.0250315	0.00148142	39.9497	2.36431	0.670702	0.0338599		35.2014	2.08329	0.670702	0.0338599
B6 2.FIN2	0.0087218	0.000520083	114.655	6.83693	0.33025	0.0300025		101.028	6.0243	0.33025	0.0300025
B6 3.FIN2	0.00632897	0.000203176	158.004	5.0723	0.111087	0.0101417		139.224	4.46942	0.111087	0.0101417
B6 4.FIN2	0.00646691	0.000348782	154.633	8.33988	0.112969	0.0172941		136.254	7.34862	0.112969	0.0172941
B6 5.FIN2	0.00613527	0.000212313	162.992	5.64041	0.101851	0.00662585		143.619	4.97	0.101851	0.00662585
B6 6.FIN2	0.00877656	0.000497926	113.94	6.46422	0.34084	0.0250042		100.397	5.69589	0.34084	0.0250042
B6 7.FIN2	0.00901232	0.00067909	110.959	8.36092	0.319438	0.0336326		97.7708	7.36715	0.319438	0.0336326
B6 8.FIN2	0.00602855	0.000190603	165.877	5.24449	0.0939272	0.00644597		146.161	4.62114	0.0939272	0.00644597
B6 9.FIN2	0.00620332	0.000290336	161.204	7.54489	0.0894345	0.00905305		142.044	6.64812	0.0894345	0.00905305
B6 10.FIN2	0.0159954	0.00109143	62.5181	4.26586	0.648919	0.0544091		55.0873	3.75883	0.648919	0.0544091
B6 11.FIN2	0.00664355	0.000242023	150.522	5.48347	0.0804983	0.00447089		132.631	4.83171	0.0804983	0.00447089
B6 12.FIN2	0.0114148	0.000634351	87.6059	4.86851	0.506297	0.0465785		77.1933	4.28985	0.506297	0.0465785
B6 13.FIN2	0.0272429	0.00284821	36.7068	3.83764	0.655291	0.0526659		32.3439	3.38151	0.655291	0.0526659
B6 14.FIN2	0.0226668	0.00106637	44.1173	2.07551	0.646298	0.0277031		38.8736	1.82882	0.646298	0.0277031
B6 15.FIN2	0.00758242	0.000433842	131.884	7.546	0.199314	0.0234162		116.209	6.6491	0.199314	0.0234162
B6 16.FIN2	0.00808787	0.000409728	123.642	6.26365	0.275575	0.023046		108.946	5.51917	0.275575	0.023046
B6 17.FIN2	0.0793668	0.00758118	12.5997	1.20354	1.31293	0.226072		11.1021	1.06049	1.31293	0.226072	Too large uncertainty
B6 18.FIN2	0.0262661	0.00212249	38.0719	3.07647	0.653615	0.0413978		33.5467	2.71081	0.653615	0.0413978
B6 19.FIN2	0.0128655	0.00078923	77.727	4.76813	0.488863	0.0284131		68.4886	4.2014	0.488863	0.0284131
B6 20.FIN2	0.0208014	0.00145625	48.0736	3.3655	0.659758	0.050684		42.3597	2.96548	0.659758	0.050684
B6 21.FIN2	0.00617689	0.000297248	161.894	7.79074	0.129384	0.0152051		142.651	6.86475	0.129384	0.0152051
B6 22.FIN2	0.0092822	0.000638589	107.733	7.41173	0.36116	0.0334211		94.9281	6.53079	0.36116	0.0334211
B6 23.FIN2	0.0169725	0.00105211	58.9189	3.65232	0.643976	0.0527279		51.9159	3.21821	0.643976	0.0527279
B6 24.FIN2	0.00758344	0.000327626	131.866	5.69699	0.240557	0.0167195		116.193	5.01985	0.240557	0.0167195
B6 25.FIN2	0.00749906	0.000417686	133.35	7.42738	0.154047	0.00944814		117.5	6.54458	0.154047	0.00944814
B6 26.FIN2	0.00592823	0.000269181	168.684	7.65937	0.075176	0.00884289		148.635	6.749	0.075176	0.00884289
B6 27.FIN2	0.00649234	0.000260098	154.028	6.17071	0.096356	0.00668692		135.72	5.43727	0.096356	0.00668692
B6 28.FIN2	0.00595005	0.000284051	168.066	8.02334	0.108234	0.0161408		148.09	7.0697	0.108234	0.0161408
B6 29.FIN2	0.00587713	0.000201034	170.151	5.82021	0.0825878	0.00774582		149.927	5.12843	0.0825878	0.00774582
B6 30.FIN2	0.0118543	0.000812567	84.3574	5.78236	0.528008	0.0512484		74.3308	5.09508	0.528008	0.0512484
B6 31.FIN2	0.0278496	0.00303269	35.9072	3.91013	9.04799	6.72934		31.6393	3.44538	9.04799	6.72934	Too large uncertainty
B6 32.FIN2	0.0272295	0.00421756	36.7249	5.68829	5.38645	7.23539		32.3598	5.01219	5.38645	7.23539	Too large uncertainty
B6 33.FIN2	0.0461898	0.00287491	21.6498	1.34751	0.910216	0.0972832		19.0766	1.18735	0.910216	0.0972832
B6 34.FIN2	0.025863	0.00124538	38.6653	1.86185	0.670793	0.0335287		34.0696	1.64056	0.670793	0.0335287
B6 35.FIN2	0.0140043	0.000953319	71.4069	4.86092	0.503886	0.0416887		62.9196	4.28316	0.503886	0.0416887
B6 36.FIN2	0.00635619	0.000306938	157.327	7.59727	0.131554	0.0155076		138.627	6.69427	0.131554	0.0155076
B6 37.FIN2	0.00634249	0.000320624	157.667	7.97033	0.107988	0.0114767		138.927	7.02299	0.107988	0.0114767
B6 38.FIN2	0.00742566	0.000282257	134.668	5.11888	0.24073	0.0182912		118.662	4.51046	0.24073	0.0182912
B6 39.FIN2	0.00717633	0.000538558	139.347	10.4575	0.184633	0.0522631		122.784	9.21453	0.184633	0.0522631
B6 40.FIN2	0.0261659	0.0030081	38.2177	4.39361	1.32096	0.638516		33.6752	3.8714	1.32096	0.638516	Too large uncertainty
B6 41.FIN2	0.00627521	0.00025999	159.357	6.60237	0.0980874	0.00950732		140.416	5.81763	0.0980874	0.00950732
B6 42.FIN2	0.00666264	0.000301424	150.091	6.79024	0.15329	0.0156334		132.251	5.98316	0.15329	0.0156334
DB
DB 1.FIN2	0.0139955	0.000412167	71.4517	2.10426	0.311703	0.0102094		62.9591	1.85415	0.311703	0.0102094		age without systematic uncertainties			age with propagation by quadratic addition
DB 2.FIN2	0.0180719	0.000526883	55.3345	1.61327	0.406381	0.0141658		48.7575	1.42152	0.406381	0.0141658		age	2σ (Ma)	2σ (%)	2σ (%)	2σ (abs) Ma	age and 2σ
DB 3.FIN2	0.0467034	0.00252741	21.4117	1.15872	0.641274	0.0209624		18.8668	1.021	0.641274	0.0209624		62.08	1.65	2.65786	3.84134	2.3847	62.08±2.4Ma
DB 4.FIN2	0.0164585	0.0004346	60.7589	1.60439	0.388566	0.0115019		53.5372	1.4137	0.388566	0.0115019
DB 21.FIN2	0.0256444	0.000853417	38.9949	1.29771	0.50527	0.0173261		34.3601	1.14347	0.50527	0.0173261
DB 1.FIN2	0.0137925	0.000313773	72.5031	1.64941	0.311261	0.00866305		63.8855	1.45337	0.311261	0.00866305
DB 2.FIN2	0.01509	0.000295243	66.269	1.29658	0.330098	0.00621055		58.3924	1.14247	0.330098	0.00621055
DB 3.FIN2	0.0155527	0.000382823	64.2975	1.58265	0.342227	0.00971088		56.6552	1.39454	0.342227	0.00971088
DB 4.FIN2	0.014531	0.000317438	68.8184	1.50337	0.332335	0.00729272		60.6388	1.32469	0.332335	0.00729272
DB 5.FIN2	0.0147331	0.00034566	67.8744	1.59243	0.330139	0.00727822		59.807	1.40316	0.330139	0.00727822
DB 6.FIN2	0.0138669	0.000320738	72.1141	1.66798	0.311599	0.00719824		63.5428	1.46973	0.311599	0.00719824
DB 7.FIN2	0.0141663	0.000393249	70.5902	1.95955	0.313476	0.00839761		62.2	1.72664	0.313476	0.00839761
DB 8.FIN2	0.0146561	0.000520418	68.231	2.42279	0.324006	0.0102156		60.1212	2.13482	0.324006	0.0102156
DB 9.FIN2	0.0170556	0.000466671	58.6318	1.60427	0.406539	0.0106149		51.663	1.41359	0.406539	0.0106149
DB 10.FIN2	0.0936181	0.00364764	10.6817	0.416191	0.644925	0.0137501		9.41209	0.366723	0.644925	0.0137501
DB 11.FIN2	0.0139395	0.000359916	71.7388	1.85229	0.299397	0.00745021		63.212	1.63213	0.299397	0.00745021
DB 12.FIN2	0.197713	0.0100822	5.05784	0.25792	0.675304	0.0183365		4.45667	0.227264	0.675304	0.0183365
DB 13.FIN2	0.0157849	0.000473741	63.3516	1.90132	0.377763	0.0120495		55.8217	1.67533	0.377763	0.0120495
DB 14.FIN2	0.0160933	0.000507522	62.1376	1.95958	0.373058	0.0163476		54.752	1.72667	0.373058	0.0163476
DB 15.FIN2	0.0231915	0.00113972	43.1193	2.11906	0.481963	0.0182415		37.9942	1.86719	0.481963	0.0182415
DB 16.FIN2	0.0200089	0.00089074	49.9778	2.22487	0.464963	0.0185859		44.0375	1.96043	0.464963	0.0185859
DB 17.FIN2	0.0170339	0.000575429	58.7063	1.98318	0.382091	0.0144001		51.7286	1.74746	0.382091	0.0144001
DB 18.FIN2	0.0358219	0.00132262	27.9159	1.03071	0.581819	0.0195869		24.5978	0.908201	0.581819	0.0195869
DB 19.FIN2	0.0149156	0.000389882	67.044	1.75248	0.32116	0.00962348		59.0753	1.54418	0.32116	0.00962348
DB 20.FIN2	0.0268717	0.00111226	37.2138	1.54033	0.505169	0.0163293		32.7907	1.35725	0.505169	0.0163293
DB 21.FIN2	0.0166069	0.000449268	60.216	1.62903	0.386028	0.0112558		53.0589	1.43541	0.386028	0.0112558
2022-07-11
UNCERTAINTIES OF NIST614 DURING SESSION
2σ NIST 614 Raw 206/238 (%)	2.5
2σ NIST 614 Raw 207/206 (%)	0.47
WC-1 (%)	2.56569
correction factor	0.940878
	Pb206/U238_mean	Pb206/U238_2SE(int)	U238/Pb206	U238/Pb206_2SE	DC Pb207/Pb206_mean	DC Pb207/Pb206_2SE(int)		WC-1 corrected 238U/206Pb	2SE	207Pb/206Pb	2SE
WC1													Before correction
WC1 1.FIN2	0.0404896	0.00124953	24.6977	0.762183	0.148415	0.00909749		23.2375	0.717121	0.148415	0.00909749		age without systematic uncertainties
WC1 2.FIN2	0.0428396	0.00134641	23.3429	0.733645	0.133342	0.00548843		21.9628	0.69027	0.133342	0.00548843		age	2σ (Ma)	2σ (%)
WC1 3.FIN2	0.0441238	0.00126598	22.6635	0.650251	0.13248	0.00607244		21.3236	0.611806	0.13248	0.00607244		239.45	3.79	1.58279
WC1 4.FIN2	0.0417295	0.00121004	23.9638	0.694885	0.136201	0.00637104		22.547	0.653801	0.136201	0.00637104
WC1 5.FIN2	0.0407991	0.00107492	24.5104	0.645766	0.136203	0.00585852		23.0613	0.607587	0.136203	0.00585852
WC1 6.FIN2	0.0436916	0.00133988	22.8877	0.701891	0.174721	0.00742862		21.5345	0.660394	0.174721	0.00742862		After correction
WC1 7.FIN2	0.0434686	0.00132041	23.0051	0.69881	0.140168	0.00598397		21.645	0.657495	0.140168	0.00598397		age without systematic uncertainties			age with propagation by quadratic addition
WC1 8.FIN2	0.0445242	0.00122692	22.4597	0.618905	0.170035	0.00635518		21.1318	0.582314	0.170035	0.00635518		age	2σ (Ma)	2σ (%)	2σ (%)	2σ (abs) Ma	age and 2σ
WC1 9.FIN2	0.0428394	0.00130339	23.343	0.71021	0.151408	0.00636681		21.9629	0.66822	0.151408	0.00636681		254.31	4.02	1.58075	3.94366	10.0291	254.31±10.0Ma
WC1 10.FIN2	0.0446461	0.00144529	22.3984	0.725081	0.137311	0.00563279		21.0741	0.682212	0.137311	0.00563279
WC1 11.FIN2	0.0423686	0.00123849	23.6024	0.689928	0.148114	0.00620908		22.2069	0.649138	0.148114	0.00620908
WC1 12.FIN2	0.0428396	0.00117117	23.3429	0.638161	0.139339	0.00653544		21.9628	0.600432	0.139339	0.00653544
WC1 13.FIN2	0.0449877	0.00154265	22.2283	0.762219	0.151247	0.00665029		20.9141	0.717155	0.151247	0.00665029
WC1 14.FIN2	0.0381924	0.00124377	26.1832	0.852682	0.13111	0.00718032		24.6352	0.802269	0.13111	0.00718032
WC1 15.FIN2	0.0438792	0.00130782	22.7899	0.679252	0.151592	0.00561125		21.4425	0.639093	0.151592	0.00561125
WC1 16.FIN2	0.0453153	0.00150646	22.0676	0.733616	0.161775	0.00882779		20.7629	0.690243	0.161775	0.00882779
WC1 17.FIN2	0.0444462	0.0013532	22.4991	0.685006	0.137269	0.00559531		21.1689	0.644507	0.137269	0.00559531
WC1 18.FIN2	0.0418525	0.00142928	23.8934	0.815969	0.134465	0.00706033		22.4808	0.767727	0.134465	0.00706033
WC1 19.FIN2	0.043192	0.001336	23.1524	0.716144	0.143869	0.00622924		21.7836	0.673804	0.143869	0.00622924
WC1 20.FIN2	0.0422028	0.00135586	23.6951	0.761259	0.139464	0.00604439		22.2942	0.716251	0.139464	0.00604439
B6
B6 1.FIN2	0.0512458	0.0030722	19.5138	1.16986	0.717669	0.0289609		18.3601	1.10069	0.717669	0.0289609		age without systematic uncertainties			age with propagation by quadratic addition
B6 2.FIN2	0.0108252	0.000836851	92.3768	7.14125	0.463026	0.0787129		86.9153	6.71904	0.463026	0.0787129		age	2σ (Ma)	2σ (%)	2σ (%)	2σ (abs) Ma	age and 2σ
B6 3.FIN2	0.0252119	0.000801891	39.6639	1.26155	0.630104	0.023593		37.3189	1.18697	0.630104	0.023593		43.56	0.85	1.95133	4.10626	1.78869	43.56±1.8Ma
B6 4.FIN2	0.00777675	0.000729211	128.588	12.0575	0.19999	0.0825		120.986	11.3446	0.19999	0.0825
B6 5.FIN2	-117.427	30.5447	-0.00851596	0.00221515	0.163554	0.292234		-0.00801248	0.00208418	0.163554	0.292234	error
B6 6.FIN2	-25.2236	25.7839	-0.0396454	0.0405262	-0.058213	0.213368		-0.0373015	0.0381302	-0.058213	0.213368	error
B6 7.FIN2	0.00672914	0.000361751	148.607	7.98896	0.0898096	0.0206537		139.821	7.51664	0.0898096	0.0206537
B6 8.FIN2	0.0087426	0.000586855	114.382	7.67803	0.3293	0.0508918		107.62	7.22409	0.3293	0.0508918
B6 9.FIN2	-33.6772	25.523	-0.0296937	0.022504	-0.00521849	0.265779		-0.0279381	0.0211735	-0.00521849	0.265779	error
B6 10.FIN2	0.00653421	0.000208729	153.041	4.88873	0.0526824	0.00546148		143.993	4.59969	0.0526824	0.00546148
B6 11.FIN2	0.0101421	0.000826931	98.5988	8.03919	0.421567	0.073695		92.7694	7.56389	0.421567	0.073695
B6 12.FIN2	0.0120367	0.000696922	83.079	4.81024	0.426868	0.0349909		78.1672	4.52585	0.426868	0.0349909
B6 13.FIN2	0.00650905	0.000285446	153.632	6.73733	0.0567178	0.00925777		144.549	6.339	0.0567178	0.00925777
B6 14.FIN2	0.0119768	0.000493073	83.495	3.43742	0.383838	0.0166219		78.5586	3.23419	0.383838	0.0166219
B6 15.FIN2	-40.978	24.3429	-0.0244034	0.0144968	-0.281385	0.32104		-0.0229606	0.0136397	-0.281385	0.32104	error
B6 16.FIN2	0.00683625	0.000264147	146.279	5.65209	0.0913093	0.0111487		137.631	5.31793	0.0913093	0.0111487
B6 17.FIN2	0.00661301	0.000229515	151.217	5.24824	0.0624091	0.00587563		142.277	4.93795	0.0624091	0.00587563
B6 18.FIN2	0.00714681	0.000305964	139.923	5.99027	0.123747	0.0144979		131.65	5.63611	0.123747	0.0144979
B6 19.FIN2	0.0170963	0.000727672	58.4923	2.48962	0.552505	0.0276316		55.0341	2.34243	0.552505	0.0276316
B6 20.FIN2	0.00651122	0.000246189	153.581	5.8069	0.0629267	0.00807492		144.501	5.46358	0.0629267	0.00807492
B6 21.FIN2	0.021538	0.00393674	46.4295	8.48643	0.49639	0.0325436		43.6845	7.98469	0.49639	0.0325436
B6 22.FIN2	0.00671942	0.000253568	148.822	5.61605	0.0996732	0.00615835		140.024	5.28402	0.0996732	0.00615835
B6 23.FIN2	0.0164136	0.00087635	60.9252	3.25291	0.592351	0.0330317		57.3232	3.06059	0.592351	0.0330317
B6 24.FIN2	0.00691012	0.000672075	144.715	14.075	0.113376	0.0734477		136.159	13.2428	0.113376	0.0734477
B6 25.FIN2	0.00816717	0.000330863	122.441	4.96027	0.220179	0.0159234		115.202	4.66701	0.220179	0.0159234
B6 26.FIN2	0.0111214	0.000607397	89.9166	4.9108	0.4702	0.0412202		84.6005	4.62046	0.4702	0.0412202
B6 27.FIN2	0.0226887	0.00104273	44.0749	2.0256	0.594203	0.0219921		41.4691	1.90584	0.594203	0.0219921
B6 28.FIN2	0.00984776	0.000369667	101.546	3.81186	0.375491	0.0205568		95.5424	3.58649	0.375491	0.0205568
B6 29.FIN2	0.0228079	0.00300089	43.8445	5.76874	0.494309	0.262611		41.2523	5.42768	0.494309	0.262611	Too large uncertainty
B6 30.FIN2	0.00729829	0.00148773	137.018	27.9307	0.104376	0.234255		128.917	26.2794	0.104376	0.234255	Too large uncertainty
B6 31.FIN2	0.0130054	0.000737022	76.8913	4.35748	0.501746	0.0461171		72.3453	4.09986	0.501746	0.0461171
B6 32.FIN2	0.00621805	0.000301834	160.822	7.80656	0.0504149	0.00884586		151.314	7.34502	0.0504149	0.00884586
B6 33.FIN2	0.00687307	0.000288286	145.495	6.10271	0.0621543	0.00953952		136.893	5.74191	0.0621543	0.00953952
B6 34.FIN2	0.0077321	0.000406509	129.331	6.79948	0.169598	0.0169913		121.685	6.39748	0.169598	0.0169913
B6 35.FIN2	0.0219589	0.0010324	45.5397	2.14105	0.650737	0.0438062		42.8473	2.01447	0.650737	0.0438062
B6 36.FIN2	0.00718523	0.000446435	139.174	8.64723	0.132101	0.0264936		130.946	8.13598	0.132101	0.0264936
B6 37.FIN2	0.00715393	0.000356183	139.783	6.9596	0.117964	0.012479		131.519	6.54813	0.117964	0.012479
B6 38.FIN2	0.00640348	0.000227097	156.165	5.53834	0.0562756	0.00559319		146.932	5.2109	0.0562756	0.00559319
B6 39.FIN2	0.00733772	0.000410604	136.282	7.62607	0.148933	0.0206813		128.225	7.1752	0.148933	0.0206813
B6 40.FIN2	0.028085	0.00162288	35.6063	2.0575	0.644617	0.0314803		33.5011	1.93586	0.644617	0.0314803
DB
DB 1.FIN2	0.0147155	0.000585573	67.9555	2.70415	0.302118	0.0133159		63.9378	2.54427	0.302118	0.0133159		age without systematic uncertainties			age with propagation by quadratic addition
DB 2.FIN2	0.0149034	0.000607804	67.0986	2.73647	0.295805	0.0136272		63.1316	2.57469	0.295805	0.0136272		age	2σ (Ma)	2σ (%)	2σ (%)	2σ (abs) Ma	age and 2σ
DB 3.FIN2	0.0165131	0.000618411	60.558	2.26788	0.338691	0.0144078		56.9777	2.1338	0.338691	0.0144078		65.05	3.08	4.73482	5.95585	3.87428	65.05±3.9Ma
DB 4.FIN2	0.0166809	0.000786581	59.9489	2.82687	0.332619	0.0152323		56.4046	2.65974	0.332619	0.0152323
DB 5.FIN2	0.0274767	0.000948942	36.3945	1.25693	0.498424	0.0213463		34.2428	1.18262	0.498424	0.0213463
DB 6.FIN2	0.0195393	0.00107704	51.1789	2.82108	0.412271	0.0217012		48.1531	2.65429	0.412271	0.0217012
DB 7.FIN2	0.0160979	0.00070277	62.12	2.71191	0.320976	0.0159177		58.4473	2.55158	0.320976	0.0159177
DB 8.FIN2	0.0199637	0.000915224	50.0908	2.29638	0.393185	0.0174955		47.1293	2.16061	0.393185	0.0174955
DB 9.FIN2	0.015881	0.000640206	62.9685	2.53843	0.326504	0.0135268		59.2456	2.38836	0.326504	0.0135268
DB 10.FIN2	0.0161402	0.00066425	61.957	2.54983	0.324342	0.0143925		58.2939	2.39908	0.324342	0.0143925
DB 11.FIN2	0.0161065	0.000744129	62.0868	2.86844	0.326961	0.0173996		58.4161	2.69886	0.326961	0.0173996
DB 12.FIN2	0.0159991	0.00076231	62.5034	2.97809	0.331438	0.0175041		58.8081	2.80202	0.331438	0.0175041
DB 13.FIN2	0.0163031	0.000694484	61.338	2.61289	0.349057	0.0157226		57.7115	2.45841	0.349057	0.0157226
DB 14.FIN2	0.0167077	0.00078526	59.8528	2.81308	0.350206	0.0167281		56.3141	2.64676	0.350206	0.0167281
DB 15.FIN2	0.0206503	0.000827412	48.4255	1.94031	0.434511	0.0209057		45.5625	1.82559	0.434511	0.0209057
DB 16.FIN2	0.0159341	0.000816419	62.7586	3.21558	0.335047	0.0162472		59.0482	3.02547	0.335047	0.0162472
DB 17.FIN2	0.0169943	0.000635681	58.8433	2.20107	0.35627	0.0147786		55.3644	2.07094	0.35627	0.0147786
DB 18.FIN2	0.0154343	0.000678287	64.7906	2.84732	0.306466	0.0150158		60.96	2.67898	0.306466	0.0150158
DB 19.FIN2	0.015132	0.000663722	66.0851	2.89864	0.300152	0.0152979		62.178	2.72726	0.300152	0.0152979
DB 20.FIN2	0.0160885	0.000843485	62.1562	3.25871	0.346337	0.0194813		58.4814	3.06605	0.346337	0.0194813
2022-07-12
UNCERTAINTIES OF NIST614 DURING SESSION
2σ NIST 614 Raw 206/238 (%)	1.8
2σ NIST 614 Raw 207/206 (%)	0.47
WC-1 (%)	2.56569
correction factor	0.906054
	Pb206/U238_mean	Pb206/U238_2SE(int)	U238/Pb206	U238/Pb206_2SE	DC Pb207/Pb206_mean	DC Pb207/Pb206_2SE(int)		WC-1 corrected 238U/206Pb	2SE	207Pb/206Pb	2SE
WC1													Before correction
WC1 1.FIN2	0.0383257	0.00164729	26.0921	1.12148	0.112996	0.00557557		23.6409	1.01612	0.112996	0.00557557		age without systematic uncertainties
WC1 2.FIN2	0.0439285	0.00190741	22.7643	0.988444	0.173463	0.00859653		20.6257	0.895584	0.173463	0.00859653		age	2σ (Ma)	2σ (%)
WC1 3.FIN2	0.0436358	0.0018461	22.917	0.969549	0.163816	0.00874585		20.764	0.878464	0.163816	0.00874585		231.39	4.81	2.07874
WC1 4.FIN2	0.0458534	0.00198044	21.8086	0.941929	0.194526	0.0105864		19.7598	0.853439	0.194526	0.0105864
WC1 5.FIN2	0.0419611	0.00171991	23.8316	0.976813	0.163035	0.00829034		21.5927	0.885046	0.163035	0.00829034
WC1 6.FIN2	0.0419403	0.00180803	23.8434	1.02788	0.153246	0.00758295		21.6034	0.931315	0.153246	0.00758295		After correction
WC1 7.FIN2	0.0441725	0.00192691	22.6385	0.987547	0.169231	0.00762286		20.5117	0.894771	0.169231	0.00762286		age without systematic uncertainties			age with propagation by quadratic addition
WC1 8.FIN2	0.0428475	0.00188902	23.3386	1.02893	0.160883	0.00975955		21.146	0.932269	0.160883	0.00975955		age	2σ (Ma)	2σ (%)	2σ (%)	2σ (abs) Ma	age and 2σ
WC1 9.FIN2	0.0440476	0.00185667	22.7027	0.956953	0.181724	0.0114009		20.5699	0.867052	0.181724	0.0114009		255.07	5.34	2.09354	3.79823	9.68816	255.07±9.7Ma
WC1 10.FIN2	0.0449885	0.00217806	22.2279	1.07613	0.152479	0.0100202		20.1397	0.975035	0.152479	0.0100202
WC1 11.FIN2	0.0434676	0.00195078	23.0057	1.03247	0.172285	0.00974184		20.8444	0.935472	0.172285	0.00974184
WC1 12.FIN2	0.040996	0.00174346	24.3926	1.03736	0.112642	0.00627282		22.1011	0.939908	0.112642	0.00627282
WC1 13.FIN2	0.0404917	0.00148788	24.6964	0.907478	0.141319	0.00567175		22.3763	0.822224	0.141319	0.00567175
WC1 14.FIN2	0.0342187	0.00146327	29.2237	1.24967	0.127944	0.0075656		26.4783	1.13227	0.127944	0.0075656
WC1 15.FIN2	0.0429786	0.00192365	23.2674	1.04141	0.160082	0.00747283		21.0815	0.943571	0.160082	0.00747283
WC1 16.FIN2	0.0438496	0.00205552	22.8052	1.06903	0.174553	0.00901626		20.6628	0.968598	0.174553	0.00901626
WC1 17.FIN2	0.0410593	0.00151327	24.355	0.897621	0.13036	0.00617539		22.067	0.813293	0.13036	0.00617539
WC1 18.FIN2	0.0402022	0.00160146	24.8742	0.990869	0.148123	0.00808228		22.5374	0.897781	0.148123	0.00808228
WC1 19.FIN2	0.0380291	0.00169937	26.2957	1.17505	0.107185	0.00617816		23.8253	1.06466	0.107185	0.00617816
WC1 20.FIN2	0.0430226	0.00173997	23.2436	0.940044	0.149993	0.00792142		21.06	0.851731	0.149993	0.00792142
B6
B6 1.FIN2	0.0388128	0.00350976	25.7647	2.32984	0.702562	0.033468		23.3442	2.11097	0.702562	0.033468		age without systematic uncertainties			age with propagation by quadratic addition
B6 2.FIN2	0.00727302	0.000357654	137.494	6.76135	0.173076	0.0116654		124.577	6.12615	0.173076	0.0116654		age	2σ (Ma)	2σ (%)	2σ (%)	2σ (abs) Ma	age and 2σ
B6 3.FIN2	0.00806697	0.000465601	123.962	7.15473	0.207955	0.0147528		112.317	6.48258	0.207955	0.0147528		43.57	0.77	1.76727	3.62862	1.58099	43.57±1.6Ma
B6 4.FIN2	0.00641246	0.000311328	155.946	7.57126	0.0586864	0.00503445		141.296	6.85997	0.0586864	0.00503445
B6 5.FIN2	0.0064951	0.000332547	153.962	7.88282	0.13582	0.0208258		139.498	7.14227	0.13582	0.0208258
B6 6.FIN2	0.00610641	0.000336538	163.762	9.02531	0.0397185	0.0178331		148.377	8.17742	0.0397185	0.0178331
B6 7.FIN2	0.00712135	0.000378434	140.423	7.46217	0.169538	0.0193931		127.231	6.76113	0.169538	0.0193931
B6 8.FIN2	0.00863361	0.000672769	115.826	9.02572	0.29119	0.0600585		104.945	8.17779	0.29119	0.0600585
B6 9.FIN2	0.0102066	0.000593619	97.9763	5.69835	0.405992	0.0364298		88.7718	5.16302	0.405992	0.0364298
B6 10.FIN2	0.00612566	0.000256959	163.248	6.84791	0.054141	0.0037487		147.911	6.20458	0.054141	0.0037487
B6 11.FIN2	0.00947506	0.000437077	105.54	4.86849	0.333071	0.0171895		95.6252	4.41111	0.333071	0.0171895
B6 12.FIN2	0.00964487	0.000795155	103.682	8.54789	0.321707	0.0670193		93.9416	7.74485	0.321707	0.0670193
B6 13.FIN2	0.00726617	0.000492293	137.624	9.32423	0.148047	0.0152058		124.695	8.44826	0.148047	0.0152058
B6 14.FIN2	0.0150418	0.00109632	66.4814	4.84549	0.459591	0.023699		60.2358	4.39027	0.459591	0.023699
B6 15.FIN2	0.00839935	0.000643643	119.057	9.12334	0.276075	0.0358421		107.872	8.26624	0.276075	0.0358421
B6 16.FIN2	0.00679237	0.00037039	147.224	8.02819	0.121898	0.0116383		133.393	7.27397	0.121898	0.0116383
B6 17.FIN2	0.00664282	0.000331229	150.539	7.50627	0.0980543	0.00822949		136.396	6.80109	0.0980543	0.00822949
B6 18.FIN2	0.00919072	0.000417264	108.805	4.93982	0.313719	0.0163554		98.5836	4.47574	0.313719	0.0163554
B6 19.FIN2	0.00664483	0.000304208	150.493	6.88974	0.116679	0.0104096		136.355	6.24248	0.116679	0.0104096
B6 20.FIN2	0.00772499	0.000392206	129.45	6.57231	0.186175	0.011492		117.289	5.95487	0.186175	0.011492
B6 21.FIN2	0.00996675	0.000430449	100.334	4.33326	0.342408	0.0194354		90.9077	3.92617	0.342408	0.0194354
B6 22.FIN2	0.00675139	0.000346906	148.118	7.61073	0.0933472	0.00766482		134.203	6.89573	0.0933472	0.00766482
B6 23.FIN2	0.00818954	0.000389774	122.107	5.81159	0.279885	0.0187587		110.636	5.26561	0.279885	0.0187587
B6 24.FIN2	0.00909495	0.000664544	109.951	8.03383	0.394819	0.0737788		99.6216	7.27908	0.394819	0.0737788
B6 25.FIN2	0.00698127	0.000414511	143.24	8.50486	0.113251	0.0095106		129.784	7.70586	0.113251	0.0095106
B6 26.FIN2	0.0116598	0.000813748	85.765	5.98563	0.467073	0.0396809		77.7078	5.42331	0.467073	0.0396809
B6 27.FIN2	0.00763738	0.00037243	130.935	6.38493	0.180827	0.0123934		118.634	5.78509	0.180827	0.0123934
B6 28.FIN2	0.0228084	0.0011891	43.8435	2.28574	0.677206	0.0355986		39.7246	2.07101	0.677206	0.0355986
B6 29.FIN2	0.00687631	0.000325547	145.427	6.88498	0.144872	0.00899806		131.765	6.23817	0.144872	0.00899806
B6 30.FIN2	0.00656671	0.000432097	152.283	10.0204	0.059916	0.00648497		137.977	9.07904	0.059916	0.00648497
B6 31.FIN2	0.0113939	0.000695743	87.766	5.35923	0.395143	0.0283488		79.5208	4.85575	0.395143	0.0283488
B6 32.FIN2	0.00642332	0.000332785	155.683	8.06577	0.115209	0.0110937		141.057	7.30802	0.115209	0.0110937
B6 33.FIN2	0.00829809	0.000400004	120.51	5.80909	0.240351	0.0119027		109.188	5.26335	0.240351	0.0119027
B6 34.FIN2	0.010545	0.000633111	94.8315	5.69357	0.398319	0.0283674		85.9224	5.15868	0.398319	0.0283674
B6 35.FIN2	0.00861048	0.000392382	116.138	5.29243	0.258302	0.0154616		105.227	4.79523	0.258302	0.0154616
B6 36.FIN2	0.0115143	0.000545031	86.8489	4.11102	0.406752	0.0226167		78.6898	3.72481	0.406752	0.0226167
B6 37.FIN2	0.00722156	0.000412226	138.474	7.90447	0.214385	0.0168518		125.465	7.16188	0.214385	0.0168518
B6 38.FIN2	0.00646749	0.00041978	154.62	10.0358	0.102175	0.0120876		140.094	9.09296	0.102175	0.0120876
B6 39.FIN2	0.0122286	0.000763908	81.7753	5.1084	0.416571	0.0279335		74.0928	4.62849	0.416571	0.0279335
B6 40.FIN2	0.00907454	0.000516101	110.198	6.26737	0.302699	0.0224852		99.8458	5.67858	0.302699	0.0224852
DB
DB 1.FIN2	0.0174369	0.000802032	57.3495	2.63785	0.359547	0.0131091		51.9617	2.39004	0.359547	0.0131091		age without systematic uncertainties			age with propagation by quadratic addition
DB 2.FIN2	0.0294585	0.000936918	33.9461	1.07964	0.531023	0.0151431		30.757	0.978216	0.531023	0.0151431		age	2σ (Ma)	2σ (%)	2σ (%)	2σ (abs) Ma	age and 2σ
DB 3.FIN2	0.016163	0.000632075	61.8697	2.41949	0.339029	0.0133648		56.0573	2.19219	0.339029	0.0133648		67.25	2.19	3.25651	4.54406	3.05588	67.25±3.1Ma
DB 4.FIN2	0.0160605	0.000561509	62.2647	2.17691	0.352612	0.0132496		56.4152	1.9724	0.352612	0.0132496
DB 5.FIN2	0.0165031	0.000620962	60.5945	2.27998	0.353502	0.0129068		54.9019	2.06579	0.353502	0.0129068
DB 6.FIN2	0.0162533	0.000644131	61.5259	2.43832	0.332597	0.0126344		55.7458	2.20925	0.332597	0.0126344
DB 7.FIN2	0.0148244	0.000588921	67.4563	2.67979	0.297722	0.0115308		61.119	2.42804	0.297722	0.0115308
DB 8.FIN2	0.0158892	0.000637739	62.9358	2.52603	0.315618	0.0104949		57.0233	2.28872	0.315618	0.0104949
DB 9.FIN2	0.0153286	0.000469636	65.2376	1.99874	0.332264	0.0119422		59.1088	1.81097	0.332264	0.0119422
DB 10.FIN2	0.018037	0.000944835	55.4415	2.9042	0.369473	0.0137728		50.233	2.63136	0.369473	0.0137728
DB 11.FIN2	0.0157831	0.000603121	63.359	2.42115	0.327056	0.0121473		57.4067	2.19369	0.327056	0.0121473
DB 12.FIN2	0.0284683	0.00125409	35.1267	1.54741	0.505304	0.0238557		31.8267	1.40204	0.505304	0.0238557
DB 13.FIN2	0.0158439	0.000757047	63.1158	3.01578	0.305788	0.0128226		57.1864	2.73246	0.305788	0.0128226
DB 14.FIN2	0.0153759	0.000714455	65.0368	3.02199	0.31875	0.0127125		58.9269	2.73809	0.31875	0.0127125
DB 15.FIN2	0.0158801	0.00071253	62.9718	2.8255	0.331748	0.0144228		57.0559	2.56006	0.331748	0.0144228
DB 16.FIN2	0.0155806	0.000582868	64.1825	2.40106	0.328749	0.0132327		58.1529	2.17549	0.328749	0.0132327
DB 17.FIN2	0.0146886	0.000600087	68.0801	2.78134	0.318825	0.0145858		61.6843	2.52005	0.318825	0.0145858
DB 18.FIN2	0.0188366	0.000943321	53.0881	2.65861	0.400264	0.0150572		48.1007	2.40885	0.400264	0.0150572
DB 19.FIN2	0.0143732	0.000751838	69.5741	3.63932	0.270436	0.0114826		63.0379	3.29742	0.270436	0.0114826
DB 20.FIN2	0.016734	0.000600448	59.7584	2.14424	0.374263	0.0169443		54.1444	1.9428	0.374263	0.0169443
12/07/2022 n°2
UNCERTAINTIES OF NIST614 DURING SESSION
2σ NIST 614 Raw 206/238 (%)	1.8
2σ NIST 614 Raw 207/206 (%)	0.47
WC-1 (%)	2.56569
correction factor	0.801172
WC1													Before correction
WC1 1.FIN2	0.0389305	0.00118344	25.6868	0.780846	0.121219	0.0056494		20.5795	0.625591	0.121219	0.0056494		age without systematic uncertainties
WC1 2.FIN2	0.0368588	0.00114343	27.1306	0.841641	0.141956	0.00617569		21.7362	0.674299	0.141956	0.00617569		age	2σ (Ma)	2σ (%)
WC1 3.FIN2	0.037176	0.00122962	26.8991	0.889703	0.126265	0.00481199		21.5508	0.712805	0.126265	0.00481199		215.07	7.42	3.45004
WC1 4.FIN2	0.0370065	0.00112746	27.0223	0.823275	0.114179	0.00484247		21.6495	0.659585	0.114179	0.00484247
													After correction
													age without systematic uncertainties			age with propagation by quadratic addition
													age	2σ (Ma)	2σ (%)	2σ (%)	2σ (abs) Ma	age and 2σ
													267.74	9.22	3.44364	4.67999	12.5302	267.74±12.5Ma
